# Supplementary material for: TIR1/AFB-Aux/IAA auxin perception mediates rapid cell wall acidification and growth of Arabidopsis hypocotyls
Source: eLife journal article supplement (doi:10.7554/elife.19048), 2016-09-14
Supplement: supp [file elife-19048-supp-v1.zip]

**A**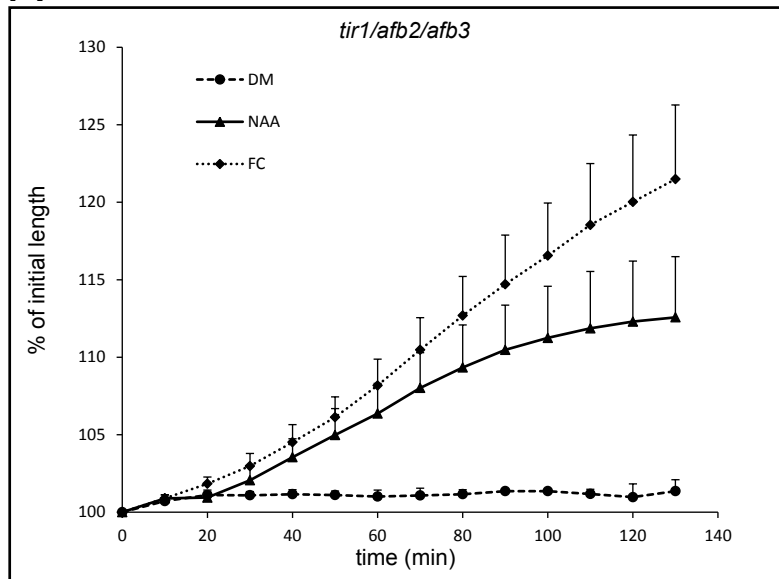**B**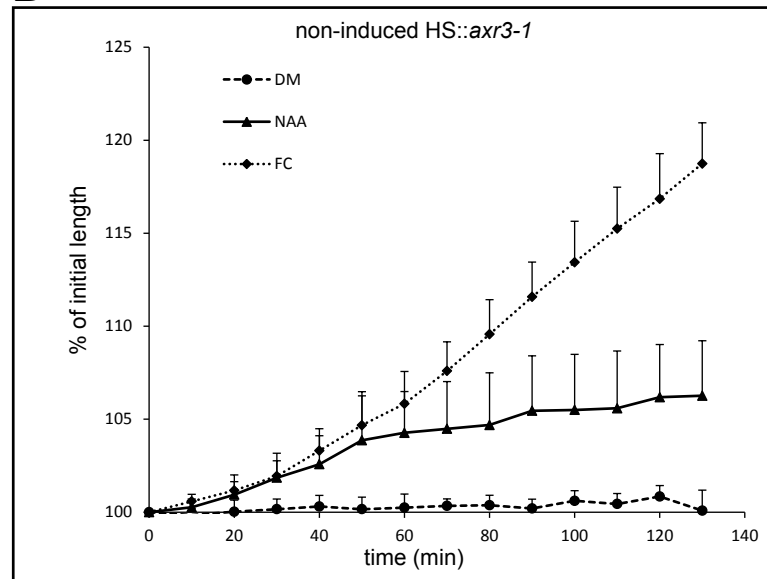

Fig. 3 figure supplement

A) The *tir1-1/afb2/afb3* mutant reacts to auxin (10  $\mu$ M NAA) and fusicoccin (1  $\mu$ M) similarly to Col-0. Errorbars represent stdev.s.

B) Non-induced *HS::axr3-1* hypocotyl segments also behave as a control – elongate in the presence of auxin (10  $\mu$ M NAA) and fusicoccin (1  $\mu$ M). Errorbars represent stdev.s.
