# Supplementary material for: TIR1/AFB-Aux/IAA auxin perception mediates rapid cell wall acidification and growth of Arabidopsis hypocotyls
Source: eLife journal article supplement (doi:10.7554/elife.19048), 2016-09-14
Supplement: supp [file elife_poa_e19048_Source_Data_File_Fig.1_5.xlsx]

## Sheet: Fig1-source data
Luciferase Experiment
2015-08-10 experiment
110s 250gain 2min delay			slice	intensity																									sds'
				DM				1 FC			1NAA						10NAA							real time	control	1uM FC	1NAA	10uM NAA
			1	1084.79	1150.03	1016.96	1166.59	1097.13	1077.87	1106.01	941.638	1001.83	1060.55	1066.17	997.729	969.5	1020.11	865.13	908.857	1051.46	1049.24	1115.04		4	1104.59	1093.67	1006.24	1001.64	68.2655	14.3905	49.3079	95.0699
			2	760.193	784.41	735.561	841.382	794.972	763.481	776.714	786.609	752.667	796.703	829.037	793.262	725.958	778.763	699.413	756.771	799.851	780.222	785.891		6	780.387	778.389	780.706	766.818	45.2907	15.8122	36.2431	35.8376
			3	715.428	692.427	675.745	729.539	701.789	694.308	695.918	660.435	670.024	730.487	764.556	687.374	670.979	714.132	680.587	623.057	714.313	695.537	724.636		8	703.285	697.338	697.309	692.044	23.8961	3.93756	41.2773	37.2792
			4	677.2	708.487	656.541	705.5	674.352	639.827	663.782	638.188	635.167	669.946	716.407	672.748	673.135	631.947	638.696	681.857	673.134	704.574	709.309		10	686.932	659.32	667.599	673.253	24.6827	17.6897	29.5355	32.4205
			5	647.193	695.692	617.265	678.632	664.535	627.192	638.884	638.029	604.405	661.513	704.759	660.738	642.188	611.211	609.609	635.114	646.657	643.685	673.036		12	659.696	643.537	651.939	636.552	34.6939	19.1014	33.1876	23.8924
			6	642.69	684.59	599.847	661.013	638.817	611.481	638.728	600.014	606.476	695.824	736.463	637.495	630.646	606.868	604.13	619.771	643.552	640.315	642.982		14	647.035	629.675	651.153	626.27	35.8299	15.7568	53.8361	18.3525
			7	633.91	669.598	591.276	639.303	622.268	609.644	618.857	583.391	629	652.568	692.13	632.215	631.479	615.816	583.196	621.543	643.761	636.111	639.164		16	633.522	616.923	636.797	623.265	32.2479	6.53044	35.4196	22.369
			8	610.614	630.846	583.133	607.974	604.148	600.221	602.898	586.928	637.31	630.203	637.333	595.477	601.208	591.5	586.652	601.457	656.567	612.593	628.291		18	608.142	602.422	614.743	612.843	19.5539	2.00625	22.7448	26.1596
			9	606.517	635.556	567.857	630.276	600.62	570.885	586.946	574.942	575.762	625.446	649.963	595.15	606.573	601.079	590.783	673.171	646.373	607.926	668.6		20	610.052	586.15	604.639	631.322	30.8349	14.8835	29.3147	35.9804
			10	607.379	634.385	592.816	618.947	584.275	582.837	573.34	631.71	621.69	623.797	662.185	605.383	642.427	645.158	624.87	684.171	705.627	678.537	744.6		22	613.382	580.151	631.199	680.494	17.6171	5.94187	19.484	42.6644
			11	628.09	624.436	583.316	594.829	584.803	556.404	573.952	628.319	597.381	622.203	698.5	654.477	659.938	711.553	743.065	852.571	770.672	695.907	871.436		24	607.668	571.72	643.47	774.201	22.0309	14.3305	35.2893	72.9837
			12	596.772	623.564	578.327	604.092	603.063	586.029		697.13	713.357	665.338	762.056	708.738	723.271	855.632	827	920	992.746	762.222	1053.93		26	600.689	594.546	711.648	901.921	18.7105	12.0449	31.758	108.585
			13	579.317	616.692	567.878	598.684	596.028	576.125	574.932	881.725	755.452	696.081	844.482	888.196	845.052	1017.11	1018.57	1250.77	1257.36	950.463	1318.85		28	590.643	582.362	818.498	1135.52	21.5231	11.8504	76.4153	157.28
			14	591.607	623.325	571.561	597.829	592.148	566.26	556.673	1152.25	889.762	758.932	978.833	1096.19	1067.56	1214.05	1265.85	1529.8	1710.7	1097.89	1716.94		30	596.081	571.694	990.587	1422.54	21.3427	18.3511	146.409	266.321
			15	587.441	627.017	561.684	574.684	585.655	579.404	566.932	1371.8	1057.88	883.284	1176.33	1411.31	1383.62	1546.74	1495.61	1954.11	2329.52	1470.2	2208.66		32	587.707	577.33	1214.04	1834.14	28.2379	9.5322	213.431	382.024
			16	595	609.752	558.296	585.855	579.965	553.846	573.163	1747.68	1231.38	1001.39	1504.48	1706.07	1643.94	1691.87	1941.83	2203.8	3076.15	1715.37	2860.91		34	587.226	568.991	1472.49	2248.32	21.6539	13.55	296.908	591.635
			17	580.303	601.615	555.969	611.066	586.542	565.731	559.156	2302.28	1465.36	1225.32	1906.65	2076.24	2004.99	2144.71	2340	2941.4	3811.15	2164.52	3754.27		36	587.238	570.476	1830.14	2859.34	24.497	14.2964	404.666	771.591
			18	564.531	585.624	556.276	574.789	573.57	559.183	558.347	2904.83	1973.6	1430.2	2238.41	2589.44	2559.93	2580.66	2999.93	3408.69	4955.7	2633.61	4355.33		38	570.305	563.7	2282.73	3488.99	12.7139	8.55789	525.784	969.964
			19	568.959	594.915	575.612	568.395	575.549	554.24	569.109	3473.93	2214.88	1566.4	2649.02	3080.78	2931.48	3385.84	3657.15	4332.63	5878.9	3261.06	5435.2		40	576.97	566.299	2652.75	4325.13	12.404	10.9288	679.283	1105.19
			20	588.952	600.53	570.99	589.184	574.655	555.74	567.163	4243.42	2657.76	1995.34	3198.67	3720.22	3439.47	3820.87	4280.61	5158.71	7463.42	3822.63	6142.13		42	587.414	565.853	3209.15	5114.73	12.2103	9.52534	795.165	1456.93
			21	566.883	586.744	550.061	576.066	570.739	563.952	558.741	5183.38	3237.69	2689.24	4155.37	4549.02	4319.95	4307.24	5197.04	5685.97	9023.63	4650.78	7566.25		44	569.938	564.477	4022.44	6071.82	15.5394	6.01623	908.239	1843.57
			22	583.834	611	553.316	572.737	572.592	567.221	576.952	5989.45	3480.93	3204.85	4878.96	5311.43	5157.24	5181.5	6074.89	6664.71	10730.3	5422.56	8836.94		46	580.222	572.255	4670.48	7151.82	24.0852	4.87425	1094.9	2187
			23	579.276	584.932	575.398	566.789	571.958	568.51	554.531	7122.97	4165.93	3901.34	5378.91	5883.97	5717.76	5835.58	7077.67	7605.31	12735	6336.5	10097.5		48	576.599	565	5361.81	8281.25	7.62198	9.22859	1188.65	2638.3
			24	583.834	573.769	549.092	574.895	573.106	559.519	575.973	7998.65	4717.52	4650.69	6386	6838.24	6724.69	7045.5	8411.37	8413.23	15007.1	7588.67	11328		50	570.398	569.533	6219.3	9632.31	14.9003	8.78977	1307.54	3020.21
			25	590.586	610.983	556.112	589.605	590.915	563.904	566.422	9323.74	5492.17	5196.99	7429.56	7873.46	7442.68	8512.76	9539.87	10093.5	17470.4	8454.15	12874.6		52	586.822	573.747	7126.43	11157.5	22.7213	14.9211	1547.36	3488.62
			26	579.993	579.803	555.684	590.368	574.366	551.529	565.347	10226.5	5803.86	6065.47	7822.81	8308.7	8328.07	9601.13	10553.7	10399.3	19674.1	9564.28	13793.7		54	576.462	563.747	7759.24	12264.4	14.7052	11.5022	1637.64	3950.47
			27	578.372	581.222	550.153	578.211	573.676	573.808	539.925	10859	6296.67	6714.66	8749.22	8941.92	9047.54	10590.7	11741.4	11857.2	22139.8	10815.3	14954.3		56	571.99	562.47	8434.84	13683.1	14.6232	19.5244	1681.59	4427.7
			28	566.614	594.35	568.724	563.316	580.232	547.615	569.374	11784.4	6870.05	7539.92	9214.67	9850.73	9337.85	11702.2	13013.5	12327.4	24397.7	11547.4	16981.1		58	573.251	565.74	9099.61	14994.9	14.241	16.6093	1746.19	5022.47
			29	572.855	590.838	561.133	563.421	573.507	560.24	559.109	12400.5	7137.05	8346.78	9954.52	10493.4	10137.5	12698.5	13958.3	12955.7	26560.2	12871.2	18371.5		60	572.062	564.285	9744.94	16235.9	13.5065	8.00619	1820.22	5494.24
			30	567.428	596.222	556.347	578.066	575.627	561.087	573.354	12891	7722.02	9010.82	10319.7	10997.7	10552.5	13270.6	14430.3	13460.8	28391.1	13661.7	18970.4		62	574.516	570.023	10249	17030.8	16.9716	7.82152	1763.88	5963.51
			31	573.476	584.47	558.663	565.421	564.239	557.26	552.422	13119.6	8297.62	9504.99	11121.2	11471.8	10717.6	14106.2	15029.9	13581.6	29745.5	15180.6	20410.4		64	570.507	557.974	10705.5	18009	11.1045	5.94074	1662.95	6248.54
			32	570.731	581.162	577.541	566.816	582.085	572.981	556.898	14262.5	8420.36	10333.8	11593.3	12042.8	11369.2	14230.4	15697.3	14373.5	31248.7	16003.3	20811		66	574.062	570.655	11337	18727.4	6.48366	12.7536	1930.64	6586.43
			33	584.931	588.051	574.49	582.487	592.218	574.635	570.571	14800.2	8902.45	10059.5	11911.2	12444.2	11912.9	14991.1	16589.7	14646.7	32741	16702.1	21397.6		68	582.49	579.141	11671.7	19511.4	5.79894	11.5056	2038.02	6915.3
			34	570.966	594.632	561.918	578.961	591.88	594.192	556.524	14908.4	8899.71	10518.7	11840.2	12396	11891.1	15679.3	17226	15096.2	33389.2	17409.5	21306.3		70	576.619	580.865	11742.3	20017.8	13.8808	21.1119	2003.03	6900.67
			35	578.014	570.205	549.663	577.276	587.042	577.288	551.803	15237.3	9080.57	10760.4	12279	12758.1	12343.6	17336	17774.4	16167.5	34791.6	18400	21461		72	568.789	572.044	12076.5	20988.4	13.228	18.1953	2062.79	6990.91
			36	573.131	577.641	548.153	582.342	583.486	579.865	554.98	16202.6	9132.74	11190.7	12502.4	13180.8	12679.3	18324.8	18693.7	16581.7	35850.7	19329.8	22563.6		74	570.317	572.777	12481.4	21890.7	15.2469	15.5186	2334.74	7113.55
			37	579.683	574.154	575.337	592.197	578.38	583.202	558.741	16045.9	9154.55	10969.7	12783.8	13322.8	12974.2	19842.3	18888.8	16671.7	36244.8	19743.4	22415.5		76	580.343	573.441	12541.8	22301.1	8.25261	12.9569	2327.2	7076.19
			38	574.897	594.248	547.204	563.197	601.451	608.135	552.014	15808	9022.93	11247.1	12981.9	13458.4	12875.5	21306	19864.3	17898.3	36772.3	20598.1	22829.7		78	569.886	587.2	12565.6	23211.4	19.8144	30.6547	2274.57	6840.13
			39	566.034	575.504	552.071	572.724	614.218	588.519	554.551	16046.8	9264.6	11172.3	12914.8	13810.7	13197.7	23170.4	20252.7	18938.6	37040.3	20704	22769.1		80	566.583	585.763	12734.5	23812.5	10.4594	29.9288	2317.65	6671.8
			40	573.428	560.308	546.082	570.789	583.465	572.548	549.857	16078.9	9298.62	11314	13061.2	14077.3	13001.3	23005.4	20632.2	19296.3	37645	21816.5	22458.8		82	562.652	568.623	12805.2	24142.4	12.4149	17.1443	2322.02	6747.8
			41	572.614	591.222	543.122	580.829	588.62	595.971	544.286	16027.3	8587.07	10916	12575.6	13740.5	13056.6	23348.7	20567.1	19815.4	37392.5	21425.9	22110.3		84	571.947	576.292	12483.8	24110	20.67	27.9609	2534.36	6621.22
			42	560.717	580.179	563.459	573.711	631.824	586.779	559.551	16285.4	9053.07	10835.4	12341.2	13934.3	12881.1	23110.4	20572.4	19241.4	37956.2	22167.3	21882.2		86	569.516	592.718	12555.1	24155	9.04447	36.5007	2497.65	6894.33
			43	563.572	604.171	548.694	573.75	614.613	591.856	546.109	16186	8785.5	10714.9	11918	14121.6	12979.1	23928.1	21159.5	20202	38228.2	22641.7	22049.4		88	572.547	584.193	12450.8	24701.5	23.4595	34.889	2598.23	6747.42
			44	567.186	588.556	899.694	565.5	631.092	599.019	555.823	16346.8	8704.4	10341.2	11656.8	14049.7	13056.1	24714.3	20819.5	19523.3	37517	22441.9	21349.9		90	655.234	595.311	12359.2	24394.3	163.311	37.7712	2726.44	6661.72
			45	553.517	588.966	551.194	582.079	622.169	605.192	547.306	16350.3	8719.33	9952.3	11106.4	13942	13124.1	24892.2	20762.5	20278.9	37609.2	21532.8	20847		92	568.939	591.556	12199.1	24320.4	19.3775	39.2502	2809.88	6719.33
			46	554.579	580.547	1285.13	574.408	633.535	605.856	545.088	16366.4	8641.43	9695.34	10519.9	13836.9	13103.1	24786	21212.6	20700.2	38310.8	22009.7	20262.5		94	748.667	594.826	12027.2	24547	357.816	45.2433	2913.21	6931.22
			47	578.069	606.607	557.48	571.026	638.514	633.5	550.782	16958.8	8315.17	9403.54	10619.6	13999	13067.7	24879.3	20534.2	20785.1	38845.5	21731.6	20569.4		96	578.295	607.599	12060.6	24557.5	20.7181	49.2685	3222.7	7191.11
			48	567.186	614.282	560.735	587	661.007	643.952	558.116	16188.5	8122.71	9110.03	10372.8	13875.2	12739.6	25475.5	20739.3	20540.1	38203.5	21707.4	20522.3		98	582.301	621.025	11734.8	24531.3	24.0723	55.1441	3073.04	6959.54
			49	564.972	592.444	572.398	582.289	662.683	636.606	547.456	16104.7	8153.05	8897.66	10061.1	14098.6	12675.3	25581	21202.2	20264	38004.3	21499.4	20022.1		100	578.026	615.582	11665.1	24428.8	11.9462	60.4221	3137.45	6948.07
			50	566.283	586.607	556.276	569.237	684.246	633.817	559.673	16047	8547.74	8888.39	10186	13697.2	12690.4	25494.2	21313.8	21137.8	38619.9	22227.5	21434.7		102	569.601	625.912	11676.1	25038	12.6214	62.6616	2966.35	6850.41
Growth experiments - controls, CHI, auxinole
2015-03-09 - ConcA and CHI treatments of Col0
Col0																stdevs
time	0	10	20	30	40	50	60	70	80	90	100	110	120	130		0	10	20	30	40	50	60	70	80	90	100	110	120	130
DM	100	100.445	100.422	100.413	100.279	100.4	100.32	100.451	100.506	100.465	100.578	100.592	100.597	100.565	DM	0	0.307757	0.293643	0.369783	0.446877	0.354618	0.30895	0.263136	0.316761	0.283255	0.420483	0.339691	0.475623	0.451017
NAA	100	100.462	101.238	102.461	103.069	105.248	106.745	107.72	108.569	109.185	109.959	110.576	111.203	111.695	NAA	0	0.320172	0.904957	1.836	2.25553	4.16986	5.18648	6.17257	6.49619	6.09763	6.08889	6.3337	6.34836	6.49154
FC	100	100.497	101.228	102.21	103.622	105.307	107.227	109.298	111.402	113.732	116.044	118.408	120.282	122.153	FC	0	0.484869	0.791948	1.24303	1.82707	2.38398	3.15323	3.55476	4.24253	4.35568	4.7291	4.9178	5.16933	5.1424
NAA-CHI	100	100.143	100.324	100.25	100.407	100.456	100.473	100.611	100.775	100.798	100.871	100.946	101.009	101.311	NAA-CHI	0	0.261579	0.296915	0.409973	0.299359	0.304763	0.48238	0.509996	0.677395	0.863737	1.14708	1.19858	0.781813	1.01917
FC-CHI	100	101.118	101.908	102.652	103.577	104.845	106.258	107.802	109.236	110.876	112.285	113.711	115.043	116.352	FC-CHI	0	0.335666	0.687419	0.977862	1.31093	1.70465	2.2894	2.70741	3.42434	4.13402	4.91144	5.38598	6.02869	6.60197
2015-08-06 - auxinole experiment
50uM auxinole was added to the depletion plate and samples were depleted with or without auxinole. Then trasnferred to DM with or without auxinole
summary
col0
time	0	10	20	30	40	50	60	70	80	90	100	110	120	130		stdevs
DM	100	101.377	101.815	102.004	102.35	102.265	102.459	102.713	102.97	103.106	103.141	102.672	102.761	102.894	DM	0	0.93936	1.0275	1.0201	1.32535	1.22748	1.21436	1.08391	1.19764	1.51075	1.51267	1.23369	1.34578	1.36074
DM + aux	100	100.441	100.695	100.866	101.179	101.612	101.469	101.815	101.946	102.046	101.976	102.297	102.648	102.741	DM aux pre	0	0.871504	0.940547	1.0185	0.925596	1.06039	1.09704	1.34166	1.15381	1.24851	1.26599	1.16096	0.880422	1.33707
FC	100	102.121	103.416	104.945	106.473	108.079	109.453	111.379	113.409	115.462	117.731	119.853	121.638	123.807	FC	0	0.853838	1.02957	1.35105	1.81	2.14737	2.52789	3.2496	3.37441	3.53631	3.74882	3.86935	4.08406	4.31003
FC+aux	100	100.968	101.785	102.933	103.908	104.724	106.098	107.621	109.281	110.939	112.557	114.165	115.649	116.863	FC+aux	0	0.29347	0.639993	0.517761	0.693043	0.963704	1.34246	1.60642	1.78636	1.82846	1.85067	2.03386	1.95868	2.4175
10NAA	100	101.225	101.862	102.838	104.283	105.175	106.055	107.471	108.891	110.135	111.391	112.399	113.563	114.39	10NAA	0	0.4584	0.730314	0.94546	1.40619	1.39888	1.62666	1.89869	2.08143	2.11329	2.11999	2.33785	2.50699	2.64534
10NAA +aux	100	101.096	101.482	101.553	102.096	102.46	103.036	103.216	103.403	103.843	103.842	104.129	104.524	104.677	10NAA +aux	0	0.617442	0.54782	0.761809	0.912716	1.15231	1.26998	1.40596	1.48885	1.37818	1.45574	1.63161	1.51845	1.54626
2015-09-09 DR5:LUC signaling in the presence of CHI, MG132, auxinole, all 50uM
	DMSO					MG132				auxinole				CHI								real time	NAA+DMSO	NAA+MG132	NAA+auxinole	NAA+CHI	stdevs
1	1129.24	975.768	1470.27	945.803	893.414	930	964.783	1091.36	1149.02	980.779	953.902	1085.17	1104.31	1071.93	1158.42	1072.01	1047.71	1160.45				4	1082.9	1033.79	1031.04	1102.1	233.657	103.483	74.779	53.2698
2	872.069	762.048	1114.75	756.168	699.441	704.295	722.544	794.994	876.676	752.74	716.907	822.106	846.622	836.808	899.659	793.609	788.518	867.669				6	840.895	774.627	784.594	837.253	165.358	78.5027	60.141	47.6963
3	783.606	692.018	981.703	658.774	657.189	631.287	662.672	748.801	805.961	693.051	660.191	743.723	771.598	753.843	826.735	723.783	739.753	815.446				8	754.658	712.18	717.141	771.912	136.935	79.8555	49.986	46.3084
4	738.252	659.643	901.402	657.139	627.505	598.748	612.817	699.528	723.203	657.646	621.652	704.409	713.018	715.151	779.541	677.957	690.412	768.144				10	716.788	658.574	674.181	726.241	111.061	61.9865	42.6409	45.6476
5	696.427	618.173	829.08	605.927	610.423	588.171	598.017	651.983	684.71	625.576	603.353	667.456	654.927	688.662	759.047	669.196	653.694	739.101				12	672.006	630.72	637.828	701.94	95.2963	45.6324	28.9185	45.3274
6	663.413	610.28	754.633	586.161	580.423	561.752	573.639	633.159	658.551	614.171	581.755	635.81	652.646	666.51	721.288	618	617.129	704.273				14	638.982	606.775	621.095	665.44	72.4828	46.5544	30.5918	47.9913
7	664.839	588.542	716.462	592.876	567.45	560.919	577.883	617.864	640.111	590.74	577.926	617.091	623.854	631.212	689.118	628.728	612.953	676.892				16	626.034	599.194	602.403	647.781	62.4905	36.2487	21.6874	33.1916
8	643.908	586.75	714.276	568.029	568.27	561.252	568.672	607.903	640.275	589.032	571.877	612.004	618.488	638.651	687.724	620.239	586.588	671.64				18	616.247	594.525	597.85	640.968	62.9914	36.731	21.4369	40.3706
9	632.734	566.798	680.643	576.781	568.342	553.922	571.411	588.256	655.309	570.215	563.054	594.215	598.854	618.146	665.865	611.859	603.165	654.777				20	605.06	592.225	581.584	630.762	50.2258	44.3309	17.6107	27.7805
10	624.693	588.452	677.834	587.628	590.676	584.016	576.767	607.898	662.696	569.266	557.255	576.606	598.39	599.722	673.553	578.87	601.506	636.525				22	613.857	607.844	575.379	618.035	38.9911	38.9114	17.2903	37.3048
11	639.706	597.363	685.357	575.226	615.135	602.368	587.594	618.807	672.879	575.266	572.284	588.777	598.463	593.485	638.659	587.457	572.459	626.77				24	622.557	620.412	583.697	603.766	42.3319	37.2289	12.1817	27.8322
12	652.615	596	709.111	603.81	649.892	634.209	612.206	612.608	693.734	570.291	578.466	576.982	599.732	600.005	627.906	593.098	571.988	628.432				26	642.286	638.189	581.368	604.286	45.4228	38.43	12.7488	24.1226
13	712.679	621.286	778.065	623.898	737.622	682.116	646.544	653.858	788.193	581.677	602.23	1040.79	618.152	590.081	628.524	577.696	563.894	615.885				28	694.71	692.678	710.712	595.216	69.8531	65.4981	220.557	26.6975
14	747.679	640.571	848.839	664.708	791.667	757.213	693.594	688.83	860.932	583.354	639.206	592.281	655.079	581.687	628.4	580	560.788	599.338				30	738.693	750.142	617.48	590.043	86.7768	80.1691	35.0489	25.4175
15	826.679	681.946	913.352	695.511	886.423	846.64	994.089	754.375	932.135	615.184	693.961	616.723	694.799	581.783	611.1	565.598	553.224	598.971				32	800.782	881.81	655.167	582.135	107.099	104.269	45.2852	23.6213
16	940.225	716.095	1042.69	747.577	1093.52	937.733	845.183	833.614	1057.8	642.228	737.181	637.274	756.506	582.409	606.406	578.587	560.035	605.921				34	908.022	918.583	693.297	586.672	170.412	103.852	62.364	19.7042
17	1078.28	757.893	1155.93	830.27	1296.87	1055.77	988.333	906.466	1186.58	666.171	812.181	665.504	844.591	563.51	600.894	559.598	548.835	590.381				36	1023.85	1034.29	747.112	572.644	225.361	118.469	94.7759	21.9839
18	1218.13	831.512	1270.67	912.796	2052.31	1222.89	1074.77	1024.55	1319.67	710.392	863.466	703.712	899.372	569.995	603.859	554.065	539.588	596.791				38	1257.08	1160.47	794.236	572.86	483.147	135.472	101.769	27.3958
19	1391.99	873.393	1427.09	1014.75	1656.68	1452.24	1151.39	1187.48	1493.35	747.101	934.353	733.376	969.884	567.434	597.882	559.75	552.271	582.942				40	1272.78	1321.12	846.178	572.056	320.735	176.56	123.313	18.3694
20	1595.66	964.786	1629.38	1094.14	1999.43	1606.34	1265.64	1294.91	1738.54	815.728	1034.85	810.467	1067.13	562.768	589.924	545.011	543.706	580.137				42	1456.68	1476.36	932.043	564.309	423.413	233.066	137.994	20.6514
21	1807.37	966.226	1805.17	1173.17	2371.17	1810.02	1369.84	1467.93	1950.41	878.987	1105.64	828.223	1165.84	563.167	589.753	562.087	550.365	587.223				44	1624.62	1649.55	994.673	570.519	561.388	275.374	166.034	17.1778
22	2032.71	1109.56	1960.93	1340.29	2687.72	1935.71	1528.24	1630.11	2113.82	950.962	1199.77	885.697	1249.47	560.833	582.741	554.098	530.4	580.827				46	1826.24	1801.97	1071.47	561.78	623.036	270.556	179.98	21.487
23	2381.04	1178.52	2176.84	1439.9	3187.61	2131.99	1671.49	1820.73	2500.76	1043.6	1301.36	940.234	1335.93	559.96	575.424	552.011	541.753	586.683				48	2072.78	2031.24	1155.28	563.166	798.27	367.121	193.813	18.0037
24	2663.78	1334.55	2324.42	1569.29	3808.04	2244.79	1871.53	2017.8	2779.36	1171.25	1401.52	1004.13	1444.48	558.49	594.688	561.761	545.847	576.496				50	2340.02	2228.37	1255.35	567.456	982.997	398.134	206.006	18.7288
25	2897.67	1421.65	2490.62	1687.47	4476.14	2456.78	2024.3	2381.72	3036.34	1248.58	1460.03	1063.03	1515.34	564.273	592.847	548.163	551.976	582.719				52	2594.71	2474.79	1321.74	567.996	1208.47	419.233	207.276	19.3532
26	3156.07	1587.97	2597.89	1888.33	5073.21	2650.19	2321.09	2539.66	3385.62	1398.87	1569.66	1103.5	1539.57	556.995	579.459	546.859	541.282	576.978				54	2860.69	2724.14	1402.9	560.315	1379.93	461.703	213.032	17.3096
27	3616.79	1694.46	2772.75	2091.87	5671.44	2857.65	2648.27	2864.97	3793.2	1506.87	1705.88	1193.77	1650.04	552.308	570.059	542.902	536.271	562.396				56	3169.46	3041.02	1514.14	552.787	1577.52	511.421	229.439	13.7965
28	4053.92	1820.27	2896.68	2293.93	6190.44	3049.91	2984.68	3226.32	4096.2	1605.73	1820.79	1257.8	1654.95	546.596	571.329	552.674	541.506	567.986				58	3451.05	3339.28	1584.82	556.018	1744.52	514.837	236.631	13.1169
29	4377.71	1934.95	3049.43	2442.68	6772.65	3163	3309.91	3648.48	4513.55	1798.36	1861.52	1316.92	1760.27	558.187	563.318	540.652	534.6	555.36				60	3715.48	3658.74	1684.27	550.423	1937.7	605.046	248.432	12.2145
30	4787.64	2034.74	3231.93	2686.16	7184.07	3326.14	3692.94	4086.36	4904.62	1858.88	1980.4	1433.27	1800.66	561.273	577.165	552.163	538.329	564.727				62	3984.91	4002.52	1768.3	558.731	2057.66	676.792	235.57	14.5052
31	5314.81	2165.98	3363.01	2980.15	7947.66	3482.94	3945.73	4546.32	5320.99	2015.37	1988.19	1490.29	1869.99	549.556	555.894	542.5	532.518	553.331				64	4354.32	4324	1840.96	546.76	2318.11	794.541	242.148	9.42613
32	5635.17	2258.53	3481.72	3127.7	8176.42	3618	4303.24	4877.87	5558.88	2131.02	2119.02	1578.41	1903.65	540.52	569.288	540.576	532.118	556.777				66	4535.91	4589.5	1933.03	547.856	2384.46	826.359	258.463	14.945
33	6220.74	2458.12	3610.43	3304.39	8683.7	4225.28	4687.09	5420.54	6013.3	2176.39	2169.8	1701.1	1943.38	547.636	567.971	535.739	531.271	558.446				68	4855.48	5086.55	1997.67	548.213	2560.4	789.887	225.441	15.3139
34	6768.06	2548.91	3660.01	3560.18	9305.12	3970.47	5092.62	5841.38	6527.2	2303.07	2261.85	1747.42	1992.77	546.899	568.794	531.467	539.718	563.367				70	5168.45	5357.92	2076.28	550.049	2801.55	1094.89	258.837	15.7376
35	7092.78	2713.71	3640.72	3683.65	9501.84	4019.56	5545.13	6270.33	6784.84	2413.2	2281.59	1831.93	2097.24	552.439	574.776	547.011	536.141	550.101				72	5326.54	5654.96	2155.99	552.094	2868.83	1203.04	251.925	14.1324
36	7579.06	2882.39	3639.24	3771.95	9959.18	4061.63	5883.82	6599.93	7129.86	2573.78	2368.36	1897.44	2121.29	544.106	565.229	539.989	532.318	561.23				74	5566.36	5918.81	2240.22	548.574	3061.26	1339.27	294.011	14.1022
37	8018.59	3021.62	3661.22	4007.74	10455.7	4189.82	6292.59	7053.59	7462.42	2670.87	2449.83	1981.09	2157.21	554.692	563.8	536.685	517.6	552.094				76	5832.98	6249.61	2314.75	544.974	3244.16	1456.23	306.17	18.1493
38	8619.04	3213.15	3655.7	4132.23	10627.6	4235.37	6500.13	7401.32	7680.94	2855.01	2400.16	2081.08	2224.09	541.742	575.459	545.261	538.918	565.791				78	6049.54	6454.44	2390.08	553.434	3354.56	1562.82	336.303	16.2174
39	8604.72	3211.31	3624.11	4372.31	10408.8	4227.35	6876.34	7718.78	7663.38	2799.27	2430.91	2063.07	2243.48	556.333	579.665	545.011	532.294	550.266				80	6044.25	6621.46	2384.18	552.714	3251.28	1641.79	314.852	17.4768
40	8906.03	3422.71	3629.49	4595.43	10409.1	4209.07	7168.07	8247.81	8189.41	2967.53	2412.2	2146.78	2317.02	552.05	570.224	543.402	527.918	544.173				82	6192.55	6953.59	2460.88	547.553	3237.84	1895.67	355.161	15.3979
41	9131.17	3562.64	3600.72	4608.04	10335.2	4179.55	7524.07	8649.64	8475.65	2983.46	2384.31	2133.27	2382.6	538.768	555.494	526.598	518.329	541.36				84	6247.56	7207.23	2470.91	536.11	3237.55	2078.19	361.482	14.2917
42	9278.32	3576.33	3458.64	4686.93	9971.51	4140.51	7759.57	8930.07	8679.04	3041.09	2426.14	2154.04	2365.12	540.364	567.635	535.065	531.718	550.46				86	6194.34	7377.3	2496.6	545.048	3177.59	2215.75	381.26	14.4806
43	9602.21	3643.25	3507.55	4698.12	9810.66	4167.13	8009.22	9167.28	8721.96	3115.72	2455.6	2177.43	2295.07	552.939	557.047	545.304	537.471	543.993				88	6252.36	7516.4	2510.95	547.351	3187.48	2283.22	418.988	7.71879
44	9766.64	3758.92	3441.77	4912.43	9716.8	4218.43	8398.16	9463.57	8783.52	3211.54	2485.69	2242.33	2393.45	543.717	564.659	542.478	526.894	553.482				90	6319.31	7715.92	2583.25	546.246	3171.83	2372.9	430.705	14.0222
45	9920.48	3708.07	3360.37	4900.51	9468.38	4121.19	8898.01	9740.95	8620.95	3345.06	2526.21	2261.93	2569.24	556.732	569.488	547.435	535.247	545.209				92	6271.56	7845.27	2675.61	550.822	3180.43	2528	466.523	12.9316
46	9967.86	3699.02	3457.06	4846.86	9079.4	4080.32	9084.13	9767.88	8527.14	3298.9	2453.09	2233.1	2591.27	549.879	566.153	551.391	542.906	552.554				94	6210.04	7864.87	2644.09	552.577	3086.13	2573.55	460.78	8.46349
47	10139.7	3755.01	3398.01	4842.62	8686.59	4100.57	9251.44	10069.5	8657.96	3398.9	2508.88	2152.41	2560.03	558.278	555.618	537.424	542.518	534.662				96	6164.38	8019.86	2655.05	545.7	3056.53	2676.18	528	10.6891
48	10070.9	3877.08	3421.4	4900.46	8409.57	3918.88	9426.49	10324.1	8689.15	3375.36	2510.47	2140.61	2485.53	539.444	560.824	548.109	519.812	549.64				98	6135.88	8089.66	2627.99	543.566	2943.24	2859.76	526.058	15.3021
49	9831.37	3878.52	3339.13	4754.19	8105.95	3782.87	9392.15	10420.2	8677.61	3355.42	2407.84	2163.16	2506.85	550.222	565.765	543.315	529.988	541.424				100	5981.83	8068.21	2608.32	546.143	2839.27	2945.06	518.591	13.1616
50	9655.51	3844.52	3347.74	4840.57	7818.23	3712.22	9608.97	10511	8633.37	3465.64	2447.31	2105.68	2448.6	538.48	561.082	525.533	522.129	541.957				102	5901.31	8116.39	2616.81	537.836	2722.35	3034.57	588.44	15.4584
51	9714.36	3909.27	3379.1	4877.55	7717.14	3683.78	9617.79	10931.8	8757.03	3589.25	2354.43	2175.52	2540.1	546.894	568.818	548.685	529.682	541.209				104	5919.48	8247.61	2664.83	547.058	2702.44	3171.25	634.006	14.2505
52	9631.45	3815.63	3495.69	4877.22	7328.71	3683.84	9776.52	10619.4	8576.2	3630.95	2516.01	2112.42	2514.66	546.121	558.259	547.772	528.012	550.05				106	5829.74	8164	2693.51	546.043	2603.44	3102.21	653.185	11.1063
53	9243.14	3779.73	3507.78	4736.28	7098.65	3613.68	9534.45	10359.6	8309.58	3665.88	2390.39	2133.43	2612.41	550.172	557.553	540.326	534.047	554				108	5673.11	7954.33	2700.53	547.22	2445.84	3013.83	672.669	9.77892
54	8978.98	3742.76	3560.65	4682.34	6865.3	3567.45	9821.32	10202.7	8280.03	3653.57	2391.04	2102.12	2681.4	539.636	558.282	538.13	530.976	546.137				110	5566.01	7967.87	2707.03	542.632	2316.41	3049.09	673.886	10.2751
55	8859.91	3711.36	3661.54	4618.44	6731.52	3586.8	9891.68	10091.5	8331.74	3508.73	2421.97	2094.12	2677.65	552.242	553.153	538.326	538.271	537.403				112	5516.56	7975.42	2675.62	543.879	2245.03	3029.67	604.584	8.06491
56	8584.42	3606.74	3580.01	4675.79	6454.6	3517.42	9674.1	9981.42	8175.79	3600.3	2474.8	1995.22	2694.44	542.717	549.953	548.098	524.2	535.583				114	5380.31	7837.18	2691.19	540.11	2139.12	2985.91	672.727	10.5013
57	8416.05	3491.43	3711.26	4637.82	6360.37	3621.36	9460.14	9969.01	8273.88	3688.31	2462.89	2018.35	2730.12	541.773	554.194	542.174	527.494	545.978				116	5323.38	7831.1	2724.92	542.323	2065.48	2894.96	706.175	9.67605
58	8443.31	3519.66	3851.23	4914.43	6213.05	3723.95	9699.08	9803.06	8345.75	3812.87	2477.48	2059.07	2793.2	541.202	550.7	545.663	532.047	535.302				118	5388.34	7892.96	2785.65	540.983	2005.76	2857.52	747.913	7.55805
59	8364.42	3551.96	3777.69	4550.01	6066.34	3689.61	9872.47	9733.1	8481.68	3890.56	2451.46	2053.69	2780.8	538.071	544.847	534.478	530.141	538.345				120	5262.08	7944.21	2794.13	537.176	1994.14	2904.53	789.097	5.42638
60	8238.88	3530.47	3941.74	4449.88	5995.6	3741.4	9709.38	9676.49	8402.79	3749.87	2427.07	2016.02	2830.2	552.439	552.194	539.489	540.012	540.374				122	5231.31	7882.52	2755.79	544.902	1923.28	2826.97	741.407	6.77671
61	8094.49	3438.3	3994.27	4434.15	5730.6	3826.86	9777.36	9664.78	8473.86	3856.39	2491.7	2007.43	2737.15	545.727	547.494	538.663	532.976	533.813				124	5138.36	7935.72	2773.17	539.735	1856.37	2802	783.208	6.67101
62	8034.9	3457.23	4180.38	4369.01	5720.56	3835.19	9851.53	9800.86	8661.75	3842.2	2415.29	2063.12	2779.45	544.146	546.212	536.315	523.212	532.424				126	5152.41	8037.34	2775.01	536.462	1807.19	2854.78	769.219	9.30048
63	7869.91	3347.04	4167.27	4365.77	5794.45	3790.09	10002.4	9559.18	8547.59	3793.4	2479.27	2076.32	2811.24	542.833	551.729	534.804	527.412	548.288				128	5108.89	7974.8	2790.06	541.013	1777.37	2855.47	733.291	9.93239
64	7820.64	3285.58	4345.18	4316.06	5475.33	3851.55	10208.2	9570.17	8474.18	3807.21	2468.77	2120.78	2958.13	541.303	552.176	540.109	519.106	533.475				130	5048.56	8026.02	2838.72	537.234	1732.48	2873.63	731.328	12.1536
65	7844.5	3392.46	4362.25	4290.2	5395.17	3887.6	10464.8	9755.68	8342.63	4045.57	2500.2	2145.64	3033.62	542.975	552.412	536.783	522.306	535.41				132	5056.92	8112.68	2931.26	537.977	1712.15	2951.62	827.683	11.0334
66	7764.97	3353.93	4377.98	4140.63	5201.99	3879.11	10676	9569.67	8118.4	3894.74	2475.98	2177.58	2969.13	539.035	552.159	542.576	540.812	541.029				134	4967.9	8060.8	2879.36	543.122	1696.74	2978.03	751.503	5.20543
67	7681.55	3237.3	4488.25	4246.73	5098.77	3853.73	10766.5	9578.02	7867.43	3964.45	2489.3	2120.2	2957.06	544.571	558.5	554.978	534.459	529.144				136	4950.52	8016.43	2882.75	544.33	1667.68	3019.48	798.306	12.6716
68	7543.35	3257.1	4655.78	4251.97	4931.92	3942.66	11139.8	9549.15	7779.43	3793.7	2417.52	2113.46	3028.82	532.646	559.282	534.783	528.459	538.41				138	4928.02	8102.76	2838.37	538.716	1593.98	3094.44	741.967	12.0475
69	7515.42	3282.89	4683.05	4305.88	4970.55	3972.56	11542.1	9435.31	7558.57	3957.88	2486.37	2150.24	3064.2	538.02	558.306	536.554	529.341	540.309				140	4951.56	8127.13	2914.67	540.506	1569.01	3212.32	791.292	10.7626
70	7240.31	3275.9	4779.02	4218.38	4808.37	3844.49	11616.5	9263.58	7331.59	3983.13	2428.94	2182.06	3179.13	538.611	543.247	527.674	523.341	529.518				142	4864.4	8014.05	2943.32	532.478	1465.95	3285.84	812.589	8.19924

## Sheet: Fig2-source data
acidification:
metaanalysis of all confocal pictures - get the time when the first acidification owas obvious with 10NAA
picture	time after NAA aplication in s			take into account the position in the stack - each hypo takes ~~25s to be imaged
2015-05-03	1060
	1085
	1710
	1135
2015-05-11	940
	1867
	994
	1621
	748
2015-08-06	1200
	1226
2015-09-03	900
		in minutes
average	1207.17	20.1194
stdev	346.893	5.78154
individual hypocotyl meaurement
2015-08-06 first hypocotyl
apophusion put under a paper and solution added to the top after the 3rd scan
300s
first, 10NAA
		distance									green
time	real time	growth	GFP/RFP ratio								red	ratio green/red		time	ratio	av2 ratio
-15	0		0.675555							1	1	62443.6	0.691461	-15	0.691461	0.675555
-10	300	0	0.65253							2	2	90306.8		-10	0.65965	0.65253
-5	600	0	0.709526							3	3	59516.5	0.65965	-5	0.64541	0.709526
0	900	0	0.695575							4	4	90224.3		0	0.773643	0.695575
5	1200	0	0.633038							5	5	58187.3	0.64541	5	0.617507	0.633038
10	1500	0	0.607569							6	6	90155.5		10	0.648569	0.607569
15	1800	0.0885	0.515935							7	7	75609.1	0.773643	15	0.566569	0.515935
20	2100	1.374	0.45997							8	8	97731.2		20	0.465301	0.45997
25	2400	2.6855	0.488884							9	9	59577.1	0.617507	25	0.454639	0.488884
30	2700	2.475	0.514114							10	10	96480.1		30	0.523129	0.514114
35	3000	1.794	0.495204							11	11	62749.2	0.648569	35	0.5051	0.495204
40	3300	1.8475	0.501357							12	12	96750.2		40	0.485308	0.501357
45	3600	2.2945	0.513946							13	13	53900.3	0.566569	45	0.517407	0.513946
50	3900	2.575	0.507114							14	14	95134.6		50	0.510485	0.507114
55	4200	2.36	0.499483							15	15	43694.4	0.465301	55	0.503744	0.499483
60	4500	1.9355	0.497675							16	16	93905.7		60	0.495223	0.497675
65	4800	2.2105	0.492625							17	17	42380.8	0.454639	65	0.500128	0.492625
70	5100	1.71	0.485122							18	18	93218.6		70	0.485122	0.485122
										19	19	49583.5	0.523129
										20	20	94782.6
										21	21	47009.3	0.5051
										22	22	93069.3
										23	23	45017.6	0.485308
										24	24	92760.9
										25	25	47773.7	0.517407
										26	26	92332.9
										27	27	46763	0.510485
										28	28	91605
										29	29	46155.8	0.503744
										30	30	91625.5
										31	31	45398.4	0.495223
										32	32	91672.6
										33	33	45762.8	0.500128
										34	34	91502.2
										35	35	44298.6	0.485122
										36	36	91314.3

## Sheet: Fig3-source data
2015-05-05 abp mutants experiment
																stdevs
time	0	10	20	30	40	50	60	70	80	90	100	110	120	130			0	10	20	30	40	50	60	70	80	90	100	110	120	130
Col-DM	100	100.498	100.504	100.809	100.721	100.827	100.808	100.919	101.179	101.315	101.481	101.474	101.7	101.853		Col-DM	0	0.253937	0.343261	0.238765	0.374351	0.327403	0.427509	0.841349	1.03646	0.82928	0.932039	0.978527	0.995189	1.17861
Col0-1NAA	100	100.797	101.006	101.661	102.843	104.011	105.424	106.895	108.385	109.467	110.55	111.436	112.234	112.831		Col0-1NAA	0	0.199649	0.343227	0.762398	1.24066	1.77755	2.30719	3.24353	3.56662	3.43791	3.61035	3.91731	4.06177	4.20401
Col0-10NAA	100	100.376	101.008	102.466	103.977	105.302	107.137	108.87	110.684	112.256	113.588	114.842	115.932	116.804		Col0-10NAA	0	0.886108	1.39973	1.8324	2.26095	2.60781	3.15266	3.42003	3.80895	3.88782	4.22932	4.21628	4.27597	4.27288
abp1-TD1-DM	100	100.621	100.456	100.575	100.684	100.698	100.689	100.883	101.061	101.167	101.353	101.519	101.612	101.899		abp1-TD1-DM	0	0.50904	0.314626	0.546085	0.546542	0.556359	0.516557	0.51666	0.223765	0.301774	0.31171	0.373836	0.297948	0.285996
abp1-TD1-1NAA	100	100.687	101.195	102.429	103.45	104.64	106.045	107.636	108.942	110.114	111.358	112.453	113.478	113.901		abp1-TD1-1NAA	0	0.581117	1.02398	1.58962	1.93505	2.11984	2.00468	2.59279	2.76786	3.00089	2.86794	3.35602	3.69081	3.74278
abp1-TD1-10NAA	100	100.276	100.72	102.09	103.283	104.549	105.978	107.56	109.367	111.064	112.4	113.689	114.515	115.29		abp1-TD1-10NAA	0	1.12987	1.51509	2.12555	2.74393	2.99753	3.25028	3.40201	3.22329	2.98569	2.52312	2.42364	2.15676	2.19573
abp1-c1-DM	100	100.499	100.556	100.734	100.67	100.671	100.848	101.33	101.399	101.757	101.797	102.071	102.493	102.53		abp1-c1-DM	0	0.609859	0.601791	0.397046	0.414249	0.480319	0.461174	0.610712	0.654917	0.605081	0.810386	0.863886	0.57771	0.657652
abp1-c1-1NAA	100	100.576	101.244	102.594	103.316	104.489	105.301	106.553	107.809	108.844	109.978	110.776	111.285	111.708		abp1-c1-1NAA	0	0.482087	0.53915	0.643904	0.730213	0.664065	1.61592	2.15913	2.30004	2.09938	2.27649	2.38629	2.28994	2.15375
abp1-c1-10NAA	100	100.347	101.23	102.706	104.326	105.713	107.394	108.989	110.44	111.77	113.042	113.995	114.812	115.954		abp1-c1-10NAA	0	0.77318	0.732525	0.617527	1.09038	1.30602	1.72811	2.15854	2.1329	2.19402	2.07498	2.1803	2.09356	2.48525
2015-03-24: HS::axr3-1 experiment
heat shock for 40min in 37, then 3 hour wait, deplete, make experiment
																	stdevs
Col0																Col0
time	0	10	20	30	40	50	60	70	80	90	100	110	120	130		time	0	10	20	30	40	50	60	70	80	90	100	110	120	130
Col0 DM	100	101.277	101.142	101.005	100.77	100.629	100.655	100.513	100.335	100.301	100.359	100.291	100.158	100.158		DM	0	0.267382	0.3101	0.365035	0.262765	0.349615	0.321539	0.377365	0.366719	0.354053	0.461187	0.363262	0.470756	0.517931
Col0 NAA	100	101.339	101.623	102.556	103.514	104.303	104.909	105.637	106.534	107.685	108.5	109.207	110.088	110.641		NAA	0	0.73489	0.769004	0.503076	0.703897	0.602117	1.06678	1.28667	1.58924	1.94476	2.07144	2.4182	2.57778	2.56957
Col0 FC	100	100.956	101.97	103.244	104.587	106.509	108.25	109.802	111.754	113.949	115.925	117.683	119.577	121.86		FC	0	0.425533	0.750858	0.938598	1.38198	1.78505	1.93383	1.84811	1.56715	1.562	1.35974	1.51871	1.61266	1.15787
HS::axr3-1																HS::axr3-1
HS::axr3-1 DM	100	100.834	101.088	101.367	101.458	101.357	101.374	101.334	101.464	101.454	101.152	101.262	101.21	101.298		DM	0	0.360059	0.38155	0.478012	0.427344	0.452609	0.398656	0.378436	0.499622	0.567676	0.341521	0.430117	0.417023	0.380041
HS::axr3-1 NAA	100	100.386	100.39	100.583	100.522	100.531	100.565	100.389	100.42	100.271	100.217	100.215	100.261	100.237		NAA	0	0.425512	0.527151	0.674796	0.707143	0.642281	0.724368	0.604958	0.542026	0.612431	0.7757	0.714536	0.736863	0.74504
HS::axr3-1 FC	100	100.523	101.347	102.597	103.849	105.421	106.916	109.144	109.873	111.957	113.77	115.902	118.03	119.767		FC	0	1.19494	1.26091	1.62345	1.91384	2.18224	2.39093	14.5352	2.57546	2.50373	2.53266	2.55986	2.69591	2.67995
HS::axr3-1 - no heat shock																HS::axr3-1 - no heat shock
DM	100	100.041	99.9344	100.175	100.302	100.724	100.851	101.145	101.124	100.97	100.887	100.897	100.643	100.605		DM	0	0.944027	1.6561	2.22428	2.85384	2.90926	3.2913	3.67666	3.81417	3.89085	3.69262	3.72751	3.81321	3.75866
NAA	100	100.665	101.594	103.007	104.364	105.049	106.017	106.62	107.02	107.112	107.775	107.862	108.277	108.315		NAA	0	0.659954	0.578225	0.940447	1.22081	1.35636	1.04003	1.03706	1.12232	2.07985	1.59236	1.73516	2.41543	2.11828
FC	100	100.632	102.541	104.053	105.342	107.33	108.939	110.723	112.584	114.571	116.32	118.236	120.198	121.975		FC	0	0.548933	1.43803	2.20832	2.47754	3.53281	3.54461	3.94746	4.03227	3.80998	4.0639	3.77187	3.70671	3.21467
	piclroam data
	picloram DR5::LUC
	2015-08-31 experiment
	170s exp, 300gain, 3min frame, 3min delay			slice	intensity
					DM					10NAA					10piclo										real time	control	10 uM NAA	10 uM picloram
				1	2229.5	1940.02	3277.56	1904.97	1986.05	2583.02	1757.35	2283.83	1555.27	1776.47	1903.97	2672.67	2215.53	2132.48	2591.14						6	2267.62	1991.19	2303.16	578.693	426.239	322.35
				2	1465.47	1614.25	2187.7	1260.05	1263.5	1619.09	1135.1	1435.64	996.134	1121.96	1278.37	1728.46	1465.69	1266.54	1667.72						9	1558.19	1261.59	1481.36	382.018	256.933	214.116
				3	1210.68	1056.25	1907.45	1057.18	1112.52	1359.35	907.297	1208.05	1331.37	881.561	1143.3	1493.08	1217.28	1147.05	1470.05						12	1268.82	1137.53	1294.15	362.503	229.281	173.795
				4	1117.96	981.14	1697.53	953.356	985.188	1209.84	810.993	967.53	816.68	821.475	1087.59	1297.52	1071.66	960.612	1299.46						15	1147.04	925.303	1143.37	314.293	172.037	149.816
				5	1087.81	945.07	1559.3	885.39	930.067	1093.56	838.196	972.566	769.763	777.798	1020.29	1183.13	1031.58	888.827	1274.93						18	1081.53	890.377	1079.75	277.64	139.629	150.905
				6	1053.66	796.22	1429.88	820.407	868.785	1139.84	873.268	915.952	782.278	765.581	917.65	1146.56	919.756	839.214	1214.3						21	993.791	895.384	1007.5	263.858	150.26	162.939
				7	1051.52	838.23	1403.69	797.093	852.57	1325.85	1065.62	998.964	913.887	867.919	928.764	1082.39	907.591	844.735	1172.35						24	988.622	1034.45	987.166	252.018	179.87	135.453
				8	1003.61	818.43	1311.33	799.636	857.718	1700.19	1509.14	1400.66	1191.93	1048.72	886.781	1111.72	848.976	795.561	1147.66						27	958.144	1370.13	958.14	213.034	257.03	160.426
				9	998.044	797.79	1244.42	778.407	825.906	2546.69	2046.81	1708.17	1705.31	1452.16	908.35	1232.38	913.157	757.357	1134.31						30	928.913	1891.83	989.112	196.709	422.696	191.224
				10	963.946	791.75	1242.05	827.729	836.248	3750.89	3122.43	2484.46	2476.36	1861.21	1063.53	1382.2	958.472	836.112	1241.95						33	932.345	2739.07	1096.45	184.975	720.283	218.357
				11	967.844	737.19	1187.84	764.364	795.705	5096.37	4232.07	3300.13	3673.56	2552.17	1302.58	1708.88	1070.53	800.418	1458.88						36	890.589	3770.86	1268.26	188.942	959.94	349.869
				12	882.571	702.21	1092.22	729.398	780.201	6680.9	5683.23	4430.46	5472.19	3227.31	1655.68	2087.43	1278.66	884.684	1809.33						39	837.32	5098.82	1543.16	158.261	1316.54	469.919
				13	860.424	711.27	1069.8	714.585	749.295	8945.96	7145.2	5520.07	7066.87	4243.52	2301.75	2531.41	1495.5	924.133	2557.14						42	821.075	6584.32	1961.99	151.626	1784.43	722.606
				14	877.449	663.9	1003.62	690.949	698.678	11478.1	8732.62	7521.29	9634.98	5434.92	3131.89	3190.5	1856.52	1090.47	3338.91						45	786.919	8560.38	2521.66	147.719	2266.38	997.289
				15	833.844	661.7	962.929	700.025	710.195	13945.9	10875.8	9036.8	12938.1	7145.7	4492.02	4286.26	2200.61	1203.72	4353.73						48	773.739	10788.5	3307.27	123.925	2781.02	1508.87
				16	822.4	687.09	943.182	722.975	707.107	17265.5	12918.9	10583.1	16138.8	9030.9	7128.45	5661.3	2826.76	1301.36	5575.34						51	776.551	13187.5	4498.64	106.729	3516.85	2368.8
				17	820.693	616.07	849.455	679.153	682.436	20623.7	15227.1	12618.1	20043	11755	10099.3	7740.27	3605.04	1499.71	7223.87						54	729.561	16053.4	6033.65	100.401	4115.99	3439.25
				18	777.868	642.23	863.364	687.356	679.215	24283	18160	14809.3	24100.2	14088	14114.6	9962.59	4374.06	1722.53	9269.02						57	730.007	19088.1	7888.57	89.6918	4906.07	4882.19
				2015-06-12 - picloram: FC1, NAA10, piclo1,10,100 in Col0 and afb5-5
					summary
																					stdevs
					col0
					time	0	10	20	30	40	50	60	70	80	90	100	110	120	130		time	0	10	20	30	40	50	60	70	80	90	100	110	120	130
					DM	100	100.568	100.594	100.628	100.763	100.649	100.893	100.839	100.673	100.794	100.919	100.948	100.967	101.02		DM	0	0.579553	0.498875	0.694445	0.626835	0.673149	0.719543	0.565799	0.629983	0.6104	0.570433	0.528978	0.588847	0.580359
					FC	100	101.103	102.232	103.604	105.169	107.393	109.137	110.761	112.637	114.605	116.691	118.815	120.763	122.647		FC
					Col0 NAA	100	101.016	101.308	101.917	102.991	103.848	104.644	105.296	106.201	106.95	107.599	108.383	108.861	109.488		NAA 10	0	0.591662	0.955519	1.1324	1.2327	1.57068	1.63619	1.88636	2.0629	2.24194	2.19334	2.512	2.3622	2.47162
					1 uM piclo	100	100.995	101.012	101.168	101.308	101.326	101.346	101.539	101.571	101.776	102.023	102.211	102.703	103.319		1 uM piclo
					Col0 picloram	100	100.649	100.783	100.974	101.125	101.63	102.578	103.622	104.856	106.498	107.924	109.01	109.902	110.936		10uM piclo	0	0.400835	0.446744	0.307851	0.467417	1.08887	1.43118	1.57	1.84421	2.52207	2.85181	2.78422	2.83886	3.2496
					100uM piclo	100	100.305	100.915	101.52	102.332	103.392	104.39	105.312	106.346	107.469	108.434	109.525	110.273	111.136		100uM piclo
					afb5-5
					time	0	10	20	30	40	50	60	70	80	90	100	110	120	130
					DM	100	100.511	100.62	100.892	100.91	101.021	100.991	101.188	101.019	101.134	101.186	101.139	101.161	101.295		DM	0	0.368885	0.443791	0.466869	0.292075	0.295274	0.427436	0.298175	0.407441	0.327024	0.398329	0.420439	0.44704	0.441727
					FC	100	101.116	101.988	102.924	104.133	105.777	107.502	109.399	111.515	113.472	115.509	117.43	119.405	121.145		FC
					afb5-5 NAA	100	100.9	101.142	101.745	102.766	103.435	104.29	105.021	105.756	106.491	107.224	107.92	108.479	109.01		NAA 10	0	0.395978	0.58686	0.499954	0.550187	0.772737	0.963187	1.16792	1.33736	1.53917	1.75227	2.09005	2.37765	2.5582
					1 uM piclo	100	101.12	101.249	101.135	101.219	101.305	101.344	101.322	101.387	101.389	101.376	101.574	101.634	101.746		1 uM piclo
					afb5-5 picloram	100	100.773	100.939	101.088	101.255	101.301	101.531	102.144	102.696	103.29	103.9	104.535	105.318	105.993		10uM piclo	0	0.211889	0.484583	0.371824	0.441824	0.390975	0.648671	1.11276	1.55341	2.13325	2.45224	3.10089	3.28731	3.66314
		concentration dependency
							summary																stdevs in 2h
							col0 NAA																col0 NAA
							time	0	20	40	60	80	100	120	140	160	180	200	220	240
							DM	100	100.631	100.649	100.708	100.816	100.86	101.269	101.663	101.851	102.119	102.368	102.587	102.73			DM	0.292881
							0.1 NAA	100	100.749	100.969	101.067	101.326	101.832	102.736	103.92	104.813	105.363	105.834	106.07	106.612			0.1 NAA	1.06256
							1 NAA	100	100.752	101.574	102.299	103.813	105.773	107.892	109.438	110.356	110.982	111.674	112.315	112.823			1 NAA	1.84486
							10 NAA	100	101.326	103.578	106.369	109.206	111.693	113.759	115.289	116.206	117.467	118.244	118.851	119.345			10 NAA	2.22674
							100 NAA	100	101.201	102.276	103.856	106.268	109.034	111.766	113.903	115.352	116.507	117.361	118.065	118.562			100 NAA	2.60228
							col0 piclo																col0 piclo
							DM	100	100.631	100.649	100.708	100.816	100.86	101.269	101.663	101.851	102.119	102.368	102.587	102.73			DM	0.292881
							0.1 Piclo	100	100.533	100.585	100.711	100.798	100.943	101.18	101.712	102.268	102.692	103.3	103.81	104.38			0.1 Piclo	0.342769
							1 Piclo	100	100.543	100.617	100.774	101.238	102.84	106.172	109.91	112.368	113.838	114.81	115.424	116.011			1 Piclo	1.35999
							10 Piclo	100	100.778	101.558	102.569	104.913	107.553	110.236	112.27	113.799	114.684	115.419	116.084	116.803			10 Piclo	3.60009
							100 Piclo	100	100.838	102.614	104.787	106.993	109.377	111.699	113.737	115.422	116.766	117.773	118.689	119.456			100 Piclo	2.91897
							afb5-5 NAA	0	20	40	60	80	100	120	140	160	180	200	220	240			afb5-5 NAA
							DM	100	100.426	100.573	100.675	100.675	100.811	100.82	100.937	101.157	101.053	101.099	101.188	101.486			DM	0.288408
							0.1 NAA	100	100.566	100.7	100.725	100.796	100.92	101.219	101.447	101.615	101.756	102.009	102.391	102.551			0.1 NAA	0.505036
							1 NAA	100	100.757	101.074	101.252	101.802	102.908	104.238	105.582	106.237	106.756	107.15	107.744	108.327			1 NAA	2.12937
							10 NAA	100	101.38	102.302	104.133	106.747	109.308	111.511	113.064	114.233	115.176	115.681	116.162	116.726			10 NAA	1.87633
							100 NAA	100	101.121	102.877	104.348	106.468	108.983	111.159	112.934	114.131	114.954	115.645	116.141	116.421			100 NAA	1.96742
							afb5-5 piclo																afb5-5 piclo
							DM	100	100.426	100.573	100.675	100.675	100.811	100.82	100.937	101.157	101.053	101.099	101.188	101.486			DM	0.288408
							0.1 Piclo	100	100.608	100.842	100.769	100.872	100.97	101.28	101.478	101.696	101.718	101.941	102.144	102.416			0.1 Piclo	0.182694
							1 Piclo	100	100.515	100.633	100.75	100.835	100.935	101.193	101.806	102.563	103.195	103.882	104.642	105.711			1 Piclo	0.598784
							10 Piclo	100	100.292	100.522	100.598	101.206	102.538	104.95	107.56	109.72	111.582	113.074	114.32	115.352			10 Piclo	1.30224
							100 Piclo	100	100.255	100.501	101.376	102.692	104.808	107.073	109.32	110.82	111.685	112.563	112.955	113.647			100 Piclo	1.75183
																		dose response in 2hr
																			0	0.1	1	10	100
																		col0 NAA	101.269	102.736	107.892	113.759	111.766
																		afb5-5 NAA	100.82	101.219	104.238	111.511	111.159
																		col0 piclo	101.269	101.18	106.172	110.236	111.699
																		afb5-5 piclo	100.82	101.28	101.193	104.95	107.073

## Sheet: Fig4-source data
2015-08-10ost2-1, afb 5-5 etc experiment
the depletion took longer than usual - due to disturbance by Robert
		summary															stdevs
		Col 0															Col 0
		time	0	10	20	30	40	50	60	70	80	90	100	110	120	130	time
		Col0 DM	100	100.526	100.68	100.893	100.91	100.824	100.953	100.995	101.152	101.218	101.306	101.443	101.52	101.77	DM	0	0.520521	0.564095	0.483213	0.62396	0.563308	0.593141	0.66227	0.698574	0.654906	0.749084	0.864894	0.839779	0.91155
		Col0 1FC	100	100.639	101.707	102.305	103.426	104.773	107.252	108.861	110.519	112.476	114.48	116.361	118.146	120.258	1FC	0	0.837098	0.390705	1.13821	1.24774	1.55439	1.44977	1.50996	1.34644	1.31134	1.6618	2.07066	2.34157	2.38039
		Col0 10NAA	100	100.761	101.699	102.532	103.482	104.402	105.33	106.524	107.613	108.795	109.723	110.794	111.622	112.213	10NAA	0	0.438002	0.597211	1.46478	2.44103	3.16685	3.30375	3.85778	4.23226	4.37792	4.65598	4.80964	4.79952	4.8273
		SAUR19-GFP															SAUR19-GFP
		time	0	10	20	30	40	50	60	70	80	90	100	110	120	130	time
		SAUR19-GFP DM	100	101.119	102.129	103.523	104.881	106.392	107.303	108.365	109.449	110.17	111.238	112.341	112.791	113.514	DM	0	1.79139	2.43546	2.45892	2.21239	2.74133	2.45452	2.34447	2.895	2.57334	2.68635	2.46906	2.62425	2.67401
		SAUR19-GFP 1FC	100	101.808	104.105	106.533	108.887	111.366	113.679	116.11	118.11	120.226	121.787	123.283	124.695	125.888	1FC	0	0.900272	1.25207	1.2533	1.74403	1.93116	2.32954	2.71913	3.35823	3.64292	4.13918	4.4518	4.62143	4.59923
		SAUR19-GFP 10NAA	100	101.088	102.25	103.393	104.809	105.939	107.041	108.099	109.078	110.025	110.804	111.58	112.221	112.782	10NAA	0	1.54973	1.67312	2.10905	2.51948	2.4603	2.48843	2.71487	2.84334	2.88239	3.13718	3.15744	3.06073	3.21365
	ost2-1 data also from 2015-08-10
		ost2-1															stdevs
		time	0	10	20	30	40	50	60	70	80	90	100	110	120	130
		ost2-1 DM	100	100.972	101.374	101.649	101.955	102.293	102.678	102.596	103.287	103.639	103.843	104.173	104.348	104.414		0	0.297779	0.698214	0.863452	0.700098	1.13111	1.30781	0.978364	1.19745	1.16626	1.15976	1.3165	1.12212	1.17701
		ost2-1 FC	100	102.174	103.94	106.238	108.117	110.409	112.578	114.475	116.37	117.887	119.575	120.932	121.943	122.891		0	0.663677	1.02251	1.00912	0.958083	1.05225	0.975172	0.903997	1.12672	1.45704	1.61519	1.66551	2.07947	2.15357
		Col 0															Col 0
		time	0	10	20	30	40	50	60	70	80	90	100	110	120	130	time
		Col0 DM	100	100.526	100.68	100.893	100.91	100.824	100.953	100.995	101.152	101.218	101.306	101.443	101.52	101.77	DM	0	0.520521	0.564095	0.483213	0.62396	0.563308	0.593141	0.66227	0.698574	0.654906	0.749084	0.864894	0.839779	0.91155
		Col0 FC	100	100.639	101.707	102.305	103.426	104.773	107.252	108.861	110.519	112.476	114.48	116.361	118.146	120.258	1FC	0	0.837098	0.390705	1.13821	1.24774	1.55439	1.44977	1.50996	1.34644	1.31134	1.6618	2.07066	2.34157	2.38039
		data from
		2016-05-04 ost2-2DlinesXaha2 on DM and FC and NAA
		summary															stdevs
		time	0	10	20	30	40	50	60	70	80	90	100	110	120	130		0	10	20	30	40	50	60	70	80	90	100	110	120	130
		Col-0 DM	100	100.429	100.758	101.026	101.04	101.057	100.968	101.138	101.253	101.344	101.455	101.79	101.982	102.531	Col-0 DM	0	0.249096	0.162649	0.335467	0.390402	0.430288	0.29979	0.331675	0.324361	0.648102	0.603292	0.79696	0.880658	1.04295
		ost2-2 DM	100	100.251	100.35	100.312	100.305	100.385	100.322	100.506	100.69	101.112	101.381	101.666	101.909	102.357	ost2-2 DM	0	0.335884	0.357614	0.451244	0.570568	0.556314	0.604553	0.714257	0.623751	0.491634	0.738505	0.897341	0.861194	0.972955
		ost2-2Xaha2 DM	100	100.68	100.825	100.788	100.82	100.953	100.946	101.358	102.259	103.136	104.092	105.446	106.556	107.622	ost2-2Xaha2 DM	0	0.870083	1.4626	1.91977	2.2375	2.54806	2.43234	2.44754	2.53089	2.85839	2.90008	3.26113	3.72858	3.82742
		Col-0 NAA	100	100.104	101.273	102.97	104.5	106.298	107.968	109.493	111.008	112.269	113.315	114.412	115.29	116.069	Col-0 NAA	0	0.506134	0.897513	1.48639	2.23058	3.31421	4.26564	4.8172	5.10193	5.16655	5.57618	5.63664	5.82769	6.09815
		ost2-2 NAA	100	100.171	101.23	102.684	104.301	105.78	107.431	108.887	110.087	111.196	112.395	113.487	114.507	115.47	ost2-2 NAA	0	0.232219	0.651183	1.01749	1.45533	1.88718	2.50561	2.90963	3.138	3.40457	3.37421	3.51294	3.47568	3.53489
		ost2-2Xaha2 NAA	100	100.468	101.202	101.82	102.534	103.521	104.638	105.97	107.694	109.15	110.477	111.755	112.93	114.109	ost2-2Xaha2 NAA	0	0.203807	0.476146	0.690106	0.943849	1.25615	1.67804	2.14467	2.37025	2.54756	2.62819	2.50389	2.39828	2.21385
Fusicoccin data for the mutants afb5-5, SAUR19-GFP, ost2-2D and ost2-2Dxaha2-5
for afb5-5 and SAUR19-GFP, were done together, data for ost and co.from a different experiment
data nr.35a, 2015-08-10
		FC data																stdevs
		time	0	10	20	30	40	50	60	70	80	90	100	110	120	130		0	10	20	30	40	50	60	70	80	90	100	110	120	130
		Col-0	100	100.639	101.707	102.305	103.426	104.773	107.252	108.861	110.519	112.476	114.48	116.361	118.146	120.258		0	0.837098	0.390705	1.13821	1.24774	1.55439	1.44977	1.50996	1.34644	1.31134	1.6618	2.07066	2.34157	2.38039
		afb5-5	100	101.261	102.321	103.413	104.762	106.536	108.417	110.172	112.208	114.002	115.989	118.054	119.966	121.717		0	0.391339	0.878299	1.24321	1.69645	1.96995	2.27073	2.63508	2.57131	2.36602	2.4655	2.32487	1.87291	1.82875
		SAUR19-GFP	100	101.808	104.105	106.533	108.887	111.366	113.679	116.11	118.11	120.226	121.787	123.283	124.695	125.888		0	0.900272	1.25207	1.2533	1.74403	1.93116	2.32954	2.71913	3.35823	3.64292	4.13918	4.4518	4.62143	4.59923
		for ost2-2D and the cross, #40 and #41 # 46can be merged to produce the FC data.
		Col0
		FC
		Feret diameter
		time	0	10	20	30	40	50	60	70	80	90	100	110	120	130																			stdevs
		hypo1	173.954	176.774	177.451	180.25	184.459	187.545	192.044	195.494	200.504	206.903	212.551	219.094	225.078	232.108			time	0	10	20	30	40	50	60	70	80	90	100	110	120	130
		hypo2	206.015	206.787	207.935	209.881	212.417	216.511	218.488	221.921	224.849	228.178	231.918	235.934	239.708	243.023			Col-0	100	100.84	101.394	102.434	104.161	105.987	107.528	109.593	111.55	113.766	116.054	118.833	121.157	123.535		0	0.550553	0.446693	0.594846	1.26112	1.16844	1.66877	1.95592	2.35333	3.23366	3.52378	4.21888	4.56769	4.98334
		hypo3	161.012	162.604	163.248	164.222	166.904	170.317	173.442	176.921	180.189	186.271	191.69	196.306	201.556	208.626			ost2-2D	100	100.739	101.334	102.332	103.867	105.29	107.065	109.081	110.855	112.887	115.324	117.314	119.216	121.164		0	0.524526	0.569775	1.20451	1.47257	1.86346	2.44157	2.54758	3.19558	4.08293	5.80509	6.14099	6.40825	6.95396
		hypo4	205.653	208.586	208.312	210.839	218.838	220.22	221.326	224.1	227.482	230.413	235.926	239.301	245.579	248.863			ost2-2Dxaha2-5	100	100.802	101.191	101.783	102.829	104.038	105.465	107.007	108.679	110.461	111.882	113.522	115.12	116.545		0	0.607937	0.574431	0.800928	1.14195	1.53574	2.057	2.85153	3.20679	3.83382	4.48323	4.9708	5.81184	6.14628
		hypo5	209.805	211.4	211.747	214.441	217.702	222.428	225.801	233.568	237.447	239.633	244.499	250.539	254.421	260.99
		hypo6	187.843	189.19	189.307	191.471	197.294	201.765	206.306	211.358	217.083	225.016	228.779	237.539	241.572	242.736
		percent
		hypo1	100	101.621	102.01	103.619	106.039	107.813	110.399	112.383	115.263	118.941	122.188	125.949	129.389	133.431
		hypo2	100	100.375	100.932	101.877	103.108	105.095	106.054	107.721	109.142	110.758	112.573	114.523	116.355	117.964
		hypo3	100	100.989	101.389	101.994	103.659	105.779	107.72	109.881	111.91	115.688	119.053	121.92	125.181	129.572
		hypo4	100	101.426	101.293	102.522	106.411	107.083	107.621	108.97	110.614	112.04	114.72	116.362	119.414	121.011
		hypo5	100	100.76	100.926	102.21	103.764	106.017	107.624	111.326	113.175	114.217	116.536	119.415	121.265	124.396
		hypo6	100	100.717	100.779	101.931	105.031	107.412	109.829	112.518	115.566	119.789	121.793	126.456	128.603	129.223
		Feret diameter
		time	0	10	20	30	40	50	60	70	80	90	100	110	120	130
		hypo1	172.818	175.727	176.819	178.645	181.466	185.151	188.43	191.732	194.077	198.237	201.42	205.973	208.943	211.851
		hypo2	190.52	192.333	193.582	195.76	198.081	201.559	205.361	209.48	214.009	218.002	222.122	227.772	232.476	236.299
		hypo3	193.724	193.724	196.431	198.204	200.25	202.475	204.137	206.041	210.069	212.05	216.601	220.731	224.931	229.456
		hypo4	212.511	212.551	214.895	216.372	217.598	222.991	223.913	230.521	233.118	236.409	239.403	246.522	250.05	255.877
		hypo5	240.842	242.553	244.233	245.703	247.421	251.104	254.692	258.588	262.195	266.558	270.934	275.536	279.659	284.018
		hypo6	276.899	279.201	281.205	284.614	289.233	293.532	298.429	302.419	308.183	313.56	320.356	327.536	334.648	341.766
		percent
		hypo1	100	101.683	102.315	103.372	105.004	107.136	109.034	110.944	112.301	114.709	116.55	119.185	120.903	122.586
		hypo2	100	100.952	101.607	102.75	103.969	105.794	107.79	109.952	112.329	114.425	116.587	119.553	122.022	124.028
		hypo3	100	100	101.397	102.313	103.369	104.517	105.375	106.358	108.437	109.46	111.809	113.941	116.109	118.445
		hypo4	100	100.019	101.122	101.817	102.394	104.932	105.365	108.475	109.697	111.246	112.654	116.004	117.664	120.406
		hypo5	100	100.71	101.408	102.018	102.732	104.261	105.751	107.368	108.866	110.678	112.494	114.405	116.117	117.927
		hypo6	100	100.831	101.555	102.786	104.454	106.007	107.775	109.216	111.298	113.24	115.694	118.287	120.856	123.426
		average	0	10	20	30	40	50	60	70	80	90	100	110	120	130
		length	100	100.84	101.394	102.434	104.161	105.987	107.528	109.593	111.55	113.766	116.054	118.833	121.157	123.535
		ost2-2D
		FC
		Feret diameter
		time	0	10	20	30	40	50	60	70	80	90	100	110	120	130
		hypo1	247.196	249.904	251.269	253.211	257.391	260.25	264.371	268.263	274.554	279.159	285.272	291.055	295.919	302.076
		hypo2	250.138	252.873	255.548	257.577	261.199	265.906	270.562	274.653	279.206	286.094	292.282	296.805	301.496	307.21
		hypo3	223.224	225.46	226.294	228.668	231.812	236.698	241.661	246.059	247.04	250.012	253.142	254.23	256.26	257.707
		hypo4	218.332	219.647	220.484	222.036	226.135	228.254	232.08	235.614	239.641	244.24	249.93	254.657	260.231	265.59
		hypo5	174.774	174.806	176.4	179.449	182.784	186.473	190.066	195.898	201.02	205.762	210.64	216.28	221.382	226.63
		hypo6	325.788	328.612	330.256	333.594	336.341	339.706	340.384	343.84	347.351	352.165	356.382	360.649	364.161	366.284
		percent
		hypo1	100	101.095	101.648	102.433	104.124	105.281	106.948	108.522	111.067	112.93	115.403	117.743	119.71	122.201
		hypo2	100	101.093	102.163	102.974	104.422	106.304	108.165	109.801	111.621	114.374	116.848	118.657	120.532	122.816
		hypo3	100	101.002	101.375	102.439	103.847	106.036	108.259	110.23	110.669	112.001	113.403	113.89	114.799	115.448
		hypo4	100	100.602	100.986	101.696	103.574	104.544	106.297	107.915	109.76	111.866	114.472	116.638	119.19	121.645
		hypo5	100	100.018	100.93	102.675	104.583	106.694	108.75	112.086	115.017	117.73	120.521	123.748	126.668	129.67
		hypo6	100	100.867	101.371	102.396	103.239	104.272	104.48	105.541	106.619	108.096	109.391	110.701	111.779	112.43
	nr46	time	0	10	20	30	40	50	60	70	80	90	100	110	120	130
		hypo1	208.274	209.774	211.684	215.232	217.83	223.182	229.367	234.337	239.015	245.082	249.724	254.386	261.069	266.481
		hypo2	213.928	214.478	214.189	213.928	215.058	216.947	219.536	229.02	230.645	231.89	232.125	235.051	239.704	240.52
		hypo3	232.562	235.468	235.722	236.947	243.92	244.393	248.485	248.845	249.778	252.389	255.838	257.963	262.469	267.255
		hypo4	188.162	190.379	191.018	194.165	196.451	199.542	203.027	205.645	210.162	214.283	219.164	225.788	228.74	234.361
		hypo5	221.822	220.955	223.575	223.009	226.126	227.783	230.274	234.955	238.872	241.615	244.559	250.833	253.397	258.289
		hypo6	213.214	215.713	217.72	222.648	226.586	230.185	235.771	241.124	247.649	256.377	274.41	278.002	281.128	284.58
		percent
		hypo1	100	100.72	101.637	103.341	104.588	107.158	110.128	112.514	114.76	117.673	119.902	122.14	125.349	127.947
		hypo2	100	100.257	100.122	100	100.528	101.411	102.621	107.055	107.814	108.396	108.506	109.874	112.049	112.43
		hypo3	100	101.25	101.359	101.886	104.884	105.087	106.847	107.002	107.403	108.525	110.009	110.922	112.86	114.918
		hypo4	100	101.178	101.518	103.19	104.405	106.048	107.9	109.291	111.692	113.882	116.476	119.997	121.565	124.553
		hypo5	100	99.6091	100.79	100.535	101.94	102.687	103.81	105.921	107.686	108.923	110.25	113.079	114.234	116.44
		hypo6	100	101.172	102.113	104.425	106.272	107.96	110.58	113.09	116.15	120.244	128.702	130.386	131.853	133.472
		average	0	10	20	30	40	50	60	70	80	90	100	110	120	130
		length	100	100.739	101.334	102.332	103.867	105.29	107.065	109.081	110.855	112.887	115.324	117.314	119.216	121.164
		ost2-2D X aha2
		FC
		Feret diameter
		time	0	10	20	30	40	50	60	70	80	90	100	110	120	130
		hypo1	218.186	219.146	220.184	221.145	223.182	225.32	229.035	232.175	235.053	239.019	241.075	243.206	246.293	250.018
		hypo2	244.818	246.895	247.808	248.974	251.509	253.387	254.637	256.564	258.774	259.771	260.929	262.762	264.273	265.611
		hypo3	253.213	254.827	255.812	256.462	256.462	258.66	260.094	261.49	265.319	267.571	269.691	272.523	274.243	276.632
		hypo4	242.638	243.83	245.782	247.316	249.479	251.231	253.393	256.129	260.05	265.149	267.526	272.017	274.774	276.848
		hypo5	256.632	260.25	262.36	263.501	266.663	269.785	272.677	276.279	280.223	283.817	288.467	291.894	295.926	299.868
		hypo6	215.541	217.407	218.577	219.968	224.964	226.049	228.569	227.607	230.638	231.683	232.974	235.748	237.261	238.296
		percent
		hypo1	100	100.44	100.916	101.356	102.29	103.27	104.972	106.412	107.731	109.548	110.491	111.467	112.882	114.589
		hypo2	100	100.848	101.221	101.698	102.733	103.5	104.011	104.798	105.701	106.108	106.581	107.33	107.947	108.493
		hypo3	100	100.637	101.026	101.283	101.283	102.151	102.717	103.269	104.781	105.67	106.508	107.626	108.305	109.249
		hypo4	100	100.491	101.296	101.928	102.819	103.541	104.433	105.56	107.176	109.278	110.257	112.108	113.244	114.099
		hypo5	100	101.41	102.232	102.677	103.909	105.125	106.252	107.656	109.193	110.593	112.405	113.74	115.311	116.847
		hypo6	100	100.866	101.409	102.054	104.372	104.875	106.044	105.598	107.004	107.489	108.088	109.375	110.077	110.557
		Feret diameter
		time	0	10	20	30	40	50	60	70	80	90	100	110	120	130
		hypo1	214.972	220.844	215.232	215.372	217.412	219.112	223.043	226.296	230.217	234.949	239.577	245.065	249.57	254.421
		hypo2	273.49	276.899	279.401	283.403	286.812	290.993	295.269	301.438	306.602	314.612	319.249	325.22	333.458	337.8
		hypo3	158.701	159.452	159.452	161.375	162.856	165.849	169.425	173.003	176.241	179.212	182.036	184.719	187.609	190.434
		hypo4	215.077	216.416	217.111	217.904	219.276	220.731	222.194	224.9	227.115	229.993	232.768	236.279	239.107	242.662
		hypo5	188.958	189.636	190.318	191.732	193.794	196.237	198.237	200.472	202.312	204.453	205.548	207.531	208.943	210.155
		percent
		hypo1	100	102.732	100.121	100.186	101.135	101.926	103.754	105.268	107.092	109.293	111.446	113.999	116.094	118.351
		hypo2	100	101.246	102.161	103.625	104.871	106.4	107.963	110.219	112.107	115.036	116.732	118.915	121.927	123.515
		hypo3	100	100.473	100.473	101.685	102.618	104.504	106.757	109.012	111.052	112.924	114.704	116.394	118.215	119.995
		hypo4	100	100.623	100.946	101.314	101.952	102.629	103.309	104.567	105.597	106.935	108.225	109.858	111.173	112.826
		hypo5	100	100.359	100.72	101.468	102.559	103.852	104.911	106.093	107.067	108.2	108.78	109.829	110.576	111.218
	nr46	hypo1	186.035	187.491	188.096	191.05	193.794	196.581	198.728	199.484	202.277	203.769	204.561	207.454	208.125	210.95
		hypo2	227.491	229.872	228.845	230.361	232.243	234.853	239.641	243.502	250.06	256.644	263.097	268.539	274.332	280.03
		hypo3	231.683	233.626	234.753	236.907	240.067	245.791	252.99	262.246	267.899	274.774	280.492	286.937	294.803	297.755
		hypo4	200.811	201.241	203.022	202.485	204.619	206.891	210.345	214.56	219.146	223.946	228.32	231.173	235.287	238.757
		hypo5	201.993	202.094	205.407	205.183	205.407	206.4	206.874	209.344	211.766	215.752	217.018	219.185	221.416	224.183
		hypo6	234.61	235.951	239.084	240.26	244.182	250.252	256.33	264.439	269.32	275.61	281.455	286.7	292.77	297.123
		percent
		hypo1	100	100.783	101.108	102.696	104.171	105.669	106.823	107.229	108.731	109.533	109.958	111.513	111.874	113.393
		hypo2	100	101.047	100.595	101.262	102.089	103.236	105.341	107.038	109.921	112.815	115.652	118.044	120.59	123.095
		hypo3	100	100.839	101.325	102.255	103.619	106.089	109.197	113.192	115.632	118.599	121.067	123.849	127.244	128.518
		hypo4	100	100.214	101.101	100.834	101.896	103.028	104.748	106.847	109.13	111.521	113.699	115.12	117.168	118.896
		hypo5	100	100.05	101.69	101.579	101.69	102.182	102.416	103.639	104.838	106.812	107.438	108.511	109.616	110.986
		hypo6	100	100.572	101.907	102.408	104.08	106.667	109.258	112.714	114.795	117.476	119.967	122.203	124.79	126.645
		average	0	10	20	30	40	50	60	70	80	90	100	110	120	130
		length	100	100.802	101.191	101.783	102.829	104.038	105.465	107.007	108.679	110.461	111.882	113.522	115.12	116.545
	ahadelta experiment - from the exp.nr. 45
		summary
		time	0	0.166667	0.333333	0.5	0.666667	0.833333	1	1.16667	1.33333	1.5	1.66667	1.83333	2	2.16667	2.33333	2.5	2.66667	2.83333	3	3.16667	3.33333	3.5	3.66667	3.83333	4	4.16667	4.33333	4.5	4.66667	4.83333	5	5.16667	5.33333	5.5	5.66667	5.83333	6	6.16667	6.33333	6.5	6.66667	6.83333	7	7.16667	7.33333	7.5	7.66667
		Col0	100	100.329	100.51	100.646	100.849	100.861	100.902	100.975	100.987	101.036	101.172	101.351	101.495	101.614	101.659	101.722	101.778	101.867	101.948	102.053	102.142	102.239	102.298	102.243	102.398	102.441	102.481	102.54	102.561	102.534	102.591	102.671	102.7	102.706	102.731	102.765	102.728	102.707	102.929	102.866	102.862	102.834	102.922	102.866	102.81	102.792	102.872
		SAUR19-GFP	100	101.054	102.011	102.933	103.689	104.397	104.833	105.483	106.294	107.217	108.192	108.975	109.943	110.81	111.52	112.37	113.225	113.962	114.657	115.223	115.806	116.28	116.799	117.138	117.574	117.996	118.261	118.703	118.895	119.196	119.47	119.677	119.878	120.161	120.338	120.434	120.639	120.827	121.033	121.135	121.313	121.429	121.507	121.638	121.803	121.9	122.033
		AHA2-delta95	100	100.235	100.552	100.774	101.087	101.048	101.252	101.304	101.336	101.421	101.433	101.449	101.549	101.919	101.83	102.063	102.256	102.407	102.362	102.682	102.557	102.736	102.962	103.066	103.106	103.27	103.39	103.78	103.804	103.813	104.253	104.374	104.786	104.836	105.219	105.269	105.481	105.928	106.085	106.604	106.696	106.982	107.346	107.72	108.035	108.282	108.591
		stdevs
		Col0	0	0.225788	0.266718	0.281628	0.27315	0.287529	0.298265	0.350197	0.31672	0.367486	0.39452	0.494388	0.540558	0.579197	0.607804	0.584325	0.60705	0.537162	0.645524	0.595241	0.680551	0.732601	0.687535	0.72366	0.716452	0.733459	0.795507	0.804521	0.849939	0.788617	0.86647	0.858919	0.857729	0.864567	0.951833	0.837947	0.836446	0.885296	0.782648	0.833256	0.804466	0.83381	0.79787	0.799619	0.866235	0.836118	0.822364
		SAUR19-GFP	0	0.342435	0.567382	0.894214	1.00934	1.35015	1.51131	1.83523	2.11144	2.38636	2.63022	2.83664	2.96978	3.15652	3.32948	3.41132	3.53832	3.70331	3.81408	3.96298	4.0646	4.17013	4.17686	4.22243	4.38841	4.49358	4.55678	4.67154	4.72972	4.83553	4.91813	4.93166	5.01683	5.19582	5.18376	5.30231	5.40108	5.39463	5.60367	5.5853	5.64655	5.77402	5.83174	5.89535	5.94073	5.90076	6.09993
		AHA2-delta95	0	0.290578	0.475686	0.510183	0.760694	0.78419	0.909015	1.06458	1.03744	1.32712	1.68527	1.78743	1.99965	2.05101	2.35832	2.64004	2.75533	2.97311	3.29676	3.23457	3.46687	3.51604	3.67752	3.7844	3.98766	4.11163	4.22407	4.27584	4.31521	4.58345	4.67303	4.82148	4.74116	4.82681	4.78101	4.8832	4.99743	4.9492	5.16002	5.16275	5.28889	5.22641	5.33337	5.14757	5.44197	5.62058	5.50368
[truncated: 29 more columns]

## Sheet: Fig5-source data
gravitropic experiments and pH																			2015-10-22 - graviapophusion - 1h stimulation
pooled data from 2015-10-09 and 2015-10-22
																			1.5% agarose
																				R output													R output											Total
																				control01		control02		control03		control04		control05		control06			gravi01		gravi02		gravi03		gravi04		gravi05			side	ratio			the plot done this way:
R output							R output													side	ratio	side	ratio	side	ratio	side	ratio	side	ratio	side	ratio		side	ratio	side	ratio	side	ratio	side	ratio	side	ratio		left	0.282959
Control02		Control04		Control05			gravi02		gravi05		gravi06									left	0.359946	left	0.34538	left	0.385171	left	0.315637	left	0.388004	right	0.319898		up	0.233257	up	0.352081			up	0.310205	up	0.320804		left	0.293057			#try to order the treatment
side	ratio	side	ratio	side	ratio		side	ratio	side	ratio	side	ratio								left	0.351096	left	0.346412	left	0.38571	left	0.312017	right	0.300115	right	0.351227		up	0.246834	up	0.349918			up	0.301347	up	0.310932		left	0.306339			graviT$side<-factor(graviT$side, c("left", "right", "up", "down"))
left	0.282959	left	0.216448	left	0.168197		up	0.364457	up	0.269042	up	0.269017								left	0.347062	left	0.352025	left	0.377666	left	0.302542	right	0.302641	right	0.346384		up	0.27371	up	0.352796			up	0.27601	up	0.293477		left	0.293345
left	0.293057	left	0.201016	left	0.164466		up	0.338914	up	0.285726	up	0.220476								left	0.346342	left	0.349434	left	0.372367	left	0.291582	right	0.284811	right	0.322018		up	0.297	up	0.36557			up	0.304255	up	0.323187		left	0.301362
left	0.306339	left	0.188147	left	0.165091		up	0.322905	up	0.302294	up	0.209283								left	0.358314	left	0.341938	left	0.37895	left	0.294179	right	0.286849	right	0.305613		up	0.308833	up	0.363589			up	0.308139	up	0.338386		left	0.333079			##3
left	0.293345	left	0.201679	left	0.166435		up	0.323255	up	0.30794	up	0.220153								left	0.371095	left	0.341573	left	0.388502	left	0.3081	right	0.290158	right	0.297924		up	0.300039	up	0.376148			up	0.319553	up	0.324324		left	0.333733			{
left	0.301362	left	0.2148	left	0.175398		up	0.322719	up	0.330402	up	0.230185								left	0.376799	left	0.34352	left	0.383488	left	0.306485	right	0.285579	right	0.292343		up	0.323507	up	0.373799			up	0.333001	up	0.326116		left	0.32547			boxplot(ratio~side,data=graviT, xlab="hypocotyl side", border ="red", ylab="GFP/RFP intensity ratio", ylim =c(0,0.5))
left	0.333079	left	0.21692	left	0.174629		up	0.325864	up	0.341058	up	0.2413								left	0.37235	left	0.347801	left	0.372631	left	0.290491	right	0.295408	right	0.302226		up	0.318969	up	0.348682			up	0.327501	up	0.348045		left	0.355515			stripchart(ratio~side, data=graviT, method='jitter',add = TRUE, pch=1,
left	0.333733	left	0.209148	left	0.177098		up	0.33268	up	0.329655	up	0.248193								left	0.373721	left	0.361376	left	0.389778	left	0.275564	right	0.280295	right	0.308252		up	0.304317	up	0.331985			up	0.318689	up	0.349071		left	0.38553			xlab="hypocotyl side", ylab="GFP/RFP ratio",ylim =c(0,0.5), vertical=TRUE)
left	0.32547	left	0.199291	left	0.175151		up	0.331683	up	0.317958	up	0.261631								left	0.380058	left	0.368171	left	0.382778	left	0.269328	right	0.270978	right	0.31072		up	0.304861	up	0.309721			up	0.322043	up	0.31682		left	0.216448			}
left	0.355515	left	0.198491	left	0.165118		up	0.326492	up	0.310428	up	0.266077								left	0.380199	left	0.371058	left	0.374089	left	0.275565	right	0.270652	right	0.30438		up	0.314526	up	0.283235			up	0.313346	up	0.305145		left	0.201016
left	0.38553	left	0.20863	left	0.1652		up	0.338662	up	0.292909	up	0.26483								left	0.368056	left	0.378224	left	0.378398	right	0.320187	right	0.260714	right	0.297333		up	0.3414	up	0.280637			up	0.282262	up	0.312409		left	0.188147
right	0.304508	left	0.220951	left	0.165583		up	0.346577	up	0.299035	up	0.251421								left	0.35134	left	0.390154	right	0.473843	right	0.309406	right	0.274305	right	0.300661		up	0.360136	up	0.29376			up	0.261891	up	0.325062		left	0.201679
right	0.32035	left	0.219695	left	0.164257		up	0.355661	up	0.300027	up	0.228002								left	0.344229	left	0.398563	right	0.462608	right	0.310311	right	0.277119	right	0.304052		up	0.356616	up	0.308998			up	0.268241	up	0.340425		left	0.2148
right	0.341377	left	0.205052	right	0.196159		up	0.356346	up	0.310922	up	0.214192								left	0.33434	left	0.4054	right	0.44266	right	0.312312	left	0.246918	right	0.311206		up	0.329382	up	0.309371			up	0.2818	up	0.364102		left	0.21692
right	0.361067	left	0.196471	right	0.19851		down	0.222854	up	0.320924	up	0.222298								right	0.260613	left	0.400282	right	0.427021	right	0.31	left	0.217638	left	0.307521		down	0.263467	up	0.264599			up	0.293188	up	0.389436		left	0.209148
right	0.361738	left	0.193904	right	0.214989		down	0.229561	up	0.338365	up	0.227039								right	0.278132	left	0.384525	right	0.417597	right	0.311403	left	0.214709	left	0.308726		down	0.266325	down	0.232002			up	0.293188	up	0.365326		left	0.199291
right	0.383064	left	0.195454	right	0.214349		down	0.226115	up	0.317933	down	0.17052								right	0.26549	left	0.365107	right	0.424086	right	0.325656	left	0.223141	left	0.320331		down	0.262417	down	0.206586			down	0.197013	up	0.336704		left	0.198491
right	0.406014	left	0.204563	right	0.207764		down	0.21187	up	0.278547	down	0.173592								right	0.219328	left	0.364158	right	0.426355	right	0.325354	left	0.225156	left	0.321915		down	0.278889	down	0.213208			down	0.188499	down	0.224586		left	0.20863
right	0.434445	left	0.209786	right	0.207077		down	0.203903	up	0.242244	down	0.177703								right	0.209143	left	0.365072	right	0.422372	right	0.306695	left	0.223891	left	0.342257		down	0.272258	down	0.235224			down	0.185706	down	0.226468		left	0.220951
right	0.474952	left	0.211126	right	0.212718		down	0.210187	up	0.252745	down	0.182038								right	0.219055	left	0.3596	right	0.420845	right	0.30354	left	0.226673	left	0.334418		down	0.262438	down	0.231755			down	0.181122	down	0.243132		left	0.219695
right	0.492362	right	0.203004	right	0.213809		down	0.214322	up	0.26627	down	0.191409								right	0.208395	left	0.354093	right	0.419811	right	0.309134	left	0.227868	left	0.30761		down	0.270614	down	0.228232			down	0.182981	down	0.248252		left	0.205052
		right	0.197699	right	0.210967		down	0.214528	up	0.270088	down	0.191763								right	0.217964	left	0.344171	right	0.419843			left	0.224827	left	0.312247		down	0.257772	down	0.236215			down	0.181339	down	0.265752		left	0.196471
		right	0.189341	right	0.207574		down	0.219583	up	0.273584	down	0.183236								right	0.21973	right	0.29255	right	0.423288			left	0.237287	left	0.349786		down	0.269422	down	0.232433			down	0.183731	down	0.288785		left	0.193904
		right	0.171936	right	0.198099		down	0.223555	up	0.276263	down	0.168585								right	0.22316	right	0.295951					left	0.240313	left	0.335057		down	0.278264	down	0.236576			down	0.183691	down	0.310796		left	0.195454
		right	0.16079	right	0.195571		down	0.228013	up	0.253986	down	0.165627								right	0.235102	right	0.306343					left	0.231061	left	0.285861		down	0.265323	down	0.249683			down	0.181277	down	0.307249		left	0.204563
		right	0.163487				down	0.226485	up	0.23319	down	0.166754								right	0.233026	right	0.325002					left	0.218996	left	0.273273		down	0.363274	down	0.23802			down	0.178655	down	0.287542		left	0.209786
		right	0.169546				down	0.223222	up	0.241573	down	0.173251								right	0.216579	right	0.321972							left	0.264403		down	0.271309	down	0.202644			down	0.183654	down	0.220799		left	0.211126
		right	0.174496						up	0.242186	down	0.174592								right	0.187971	right	0.319219							left	0.277223		down	0.275614	down	0.172193			down	0.194085	down	0.212999		left	0.168197
		right	0.170304						up	0.250884	down	0.176161								right	0.195242	right	0.33905							left	0.284755		down	0.270722	down	0.176118			down	0.199961	down	0.227045		left	0.164466
		right	0.166044						up	0.261541	down	0.183275										right	0.343617												down	0.187957			down	0.195506	down	0.248984		left	0.165091
		right	0.157321						up	0.272075	down	0.177211										right	0.326939												down	0.182094			down	0.18295	down	0.259047		left	0.166435
		right	0.158679						up	0.283382												right	0.328396																down	0.179082	down	0.274545		left	0.175398
		right	0.166584						up	0.309767												right	0.328626																down	0.16629	down	0.268462		left	0.174629
		right	0.179934						up	0.296512												right	0.335872																		down	0.241273		left	0.177098
		right	0.196257						up	0.217378												right	0.323626																		down	0.296308		left	0.175151
		right	0.201797						down	0.148994												right	0.316833																					left	0.165118
		right	0.197887						down	0.139903												right	0.307522																					left	0.1652
		right	0.186564						down	0.149398												right	0.311289																					left	0.165583
		right	0.168963						down	0.149993												right	0.310802																					left	0.164257
									down	0.161275												right	0.310923																					right	0.304508
									down	0.186725												right	0.312245																					right	0.32035
									down	0.18727												right	0.316067																					right	0.341377
									down	0.158096												right	0.317505																					right	0.361067
									down	0.156459												right	0.309012																					right	0.361738
									down	0.164701												right	0.295836																					right	0.383064
									down	0.179771																																		right	0.406014
									down	0.182539																																		right	0.434445
									down	0.171149																																		right	0.474952
									down	0.163205																																		right	0.492362
									down	0.155779																																		right	0.203004
									down	0.148289																																		right	0.197699
									down	0.154082																																		right	0.189341
									down	0.175887																																		right	0.171936
									down	0.176355																																		right	0.16079
									down	0.165786																																		right	0.163487
									down	0.163345																																		right	0.169546
									down	0.175677																																		right	0.174496
									down	0.182651																																		right	0.170304
									down	0.179845																																		right	0.166044
									down	0.158521																																		right	0.157321
									down	0.176248																																		right	0.158679
									down	0.188539																																		right	0.166584
									down	0.205836																																		right	0.179934
									down	0.182475																																		right	0.196257
									down	0.146853																																		right	0.201797
									down	0.144105																																		right	0.197887
									down	0.147222																																		right	0.186564
									down	0.151794																																		right	0.168963
									down	0.161483																																		right	0.19851
																																												right	0.214989
																																												right	0.214349
																																												right	0.207764
																																												right	0.207077
																																												right	0.212718
																																												right	0.213809
																																												right	0.210967
																																												right	0.207574
gravitropic behaviour of the col0 versus HS::axr3-1 after heat shock																																												right	0.198099
2015-10-22-HSaxr31-gravi.tif																																												right	0.195571
																																												up	0.364457
																																												up	0.338914
heat shocked for 40min, 1h40min after imaging started																																												up	0.322905
control not heatshocked																																												up	0.323255
																																												up	0.322719
measure angles after 6h																																												up	0.325864
																																												up	0.33268
HS::axr3-1																																												up	0.331683
														line	angle	circular																												up	0.326492
heatshocked					not heatshocked									Col0-HS	66.251	66.251																												up	0.338662
Col0	angle	HS::axr3-1	angle		Col0	angle	HS::axr3-1	angle						Col0-HS	61.928	61.928		R code																										up	0.346577
	66.251		-1.848			53.13	64.537							Col0-HS	16.39	16.39		axrAngle<- read.delim("Col0vsHSaxr3-1.txt")																										up	0.355661
	61.928		-9.866			6.34	-8.13							Col0-HS	53.746	53.746		> boxplot(angle~line,data=axrAngle, xlab="line", border ="red", ylab="angle", ylim =c(-40,120))																										up	0.356346
	16.39		-10.784			74.476	14.036							Col0-HS	49.086	49.086		> stripchart(angle~line, data=axrAngle, method='jitter',add = TRUE, pch=16,																										up	0.269042
	53.746		-4.574			30.964	59.744							Col0-HS	99.462	99.462		+ xlab="line", ylab="angle",ylim =c(-40,120), vertical=TRUE)																										up	0.285726
	49.086		4.399			59.534	52.431							Col0-HS	87.51	87.51																												up	0.302294
	99.462		-6.116			71.565	30.964							Col0-HS	75.379	75.379																												up	0.30794
	87.51		8.427			55.491	29.476							Col0-HS	81.573	81.573																												up	0.330402
	75.379		-10.954			74.745	28.811							Col0-HS	66.371	66.371																												up	0.341058
	81.573		11.31			74.055	59.621							Col0-HS	59.534	59.534																												up	0.329655
	66.371		1.736			60.524	6.843							Col0-HS	68.199	68.199																												up	0.317958
	59.534		-17.819			53.973	38.29							Col0-HS	57.265	57.265																												up	0.310428
	68.199		21.448			62.241	-28.61							Col0-HS	49.899	49.899																												up	0.292909
	57.265		19.654			53.13	41.424							Col0-HS	93.576	93.576																												up	0.299035
	49.899		-21.448			62.526	12.995							Col0-HS	84.094	84.094																												up	0.300027
	93.576		0			64.983	30.466							HS::axr3-1-HS	-1.848	358.152																												up	0.310922
	84.094		7.306			71.565	48.814							HS::axr3-1-HS	-9.866	350.134																												up	0.320924
			3.691			80.538								HS::axr3-1-HS	-10.784	349.216																												up	0.338365
			-3.094			58.671								HS::axr3-1-HS	-4.574	355.426																												up	0.317933
			-10.539											HS::axr3-1-HS	4.399	4.399																												up	0.278547
														HS::axr3-1-HS	-6.116	353.884																												up	0.242244
														HS::axr3-1-HS	8.427	8.427																												up	0.252745
														HS::axr3-1-HS	-10.954	349.046																												up	0.26627
														HS::axr3-1-HS	11.31	11.31																												up	0.270088
														HS::axr3-1-HS	1.736	1.736																												up	0.273584
														HS::axr3-1-HS	-17.819	342.181																												up	0.276263
														HS::axr3-1-HS	21.448	21.448																												up	0.253986
														HS::axr3-1-HS	19.654	19.654																												up	0.23319
														HS::axr3-1-HS	-21.448	338.552																												up	0.241573
														HS::axr3-1-HS	0	360																												up	0.242186
														HS::axr3-1-HS	7.306	7.306																												up	0.250884
														HS::axr3-1-HS	3.691	3.691																												up	0.261541
														HS::axr3-1-HS	-3.094	356.906																												up	0.272075
														HS::axr3-1-HS	-10.539	349.461																												up	0.283382
														Col0-c	53.13	53.13																												up	0.309767
														Col0-c	6.34	6.34																												up	0.296512
														Col0-c	74.476	74.476																												up	0.217378
														Col0-c	30.964	30.964																												up	0.269017
														Col0-c	59.534	59.534																												up	0.220476
														Col0-c	71.565	71.565																												up	0.209283
														Col0-c	55.491	55.491																												up	0.220153
														Col0-c	74.745	74.745																												up	0.230185
														Col0-c	74.055	74.055																												up	0.2413
														Col0-c	60.524	60.524																												up	0.248193
														Col0-c	53.973	53.973																												up	0.261631
														Col0-c	62.241	62.241																												up	0.266077
														Col0-c	53.13	53.13																												up	0.26483
														Col0-c	62.526	62.526																												up	0.251421
														Col0-c	64.983	64.983																												up	0.228002
														Col0-c	71.565	71.565																												up	0.214192
														Col0-c	80.538	80.538																												up	0.222298
														Col0-c	58.671	58.671																												up	0.227039
														HS::axr3-1-c	-8.13	351.87																												down	0.222854
														HS::axr3-1-c	14.036	14.036																												down	0.229561
														HS::axr3-1-c	59.744	59.744																												down	0.226115
														HS::axr3-1-c	52.431	52.431																												down	0.21187
														HS::axr3-1-c	30.964	30.964																												down	0.203903
														HS::axr3-1-c	29.476	29.476																												down	0.210187
														HS::axr3-1-c	28.811	28.811																												down	0.214322
														HS::axr3-1-c	59.621	59.621																												down	0.214528
														HS::axr3-1-c	6.843	6.843																												down	0.219583
														HS::axr3-1-c	38.29	38.29																												down	0.223555
														HS::axr3-1-c	-28.61	331.39																												down	0.228013
														HS::axr3-1-c	41.424	41.424																												down	0.226485
														HS::axr3-1-c	12.995	12.995																												down	0.223222
														HS::axr3-1-c	30.466	30.466																												down	0.148994
														HS::axr3-1-c	48.814	48.814																												down	0.139903
																																												down	0.149398
																																												down	0.149993
																																												down	0.161275
																																												down	0.186725
																																												down	0.18727
																																												down	0.158096
collection of all data that I obtained in the dark imaging system.																																												down	0.156459
all is after 6 hours of gravistimulation																																												down	0.164701
																																												down	0.179771
						line	angle																																					down	0.182539
						Col0	31.866													R code for the graph																								down	0.171149
						Col0	70.017																																					down	0.163205
						Col0	51.34													SaurAngle<- read.delim("Col0vsSAUR19G.txt")																								down	0.155779
						Col0	-9.462													> boxplot(angle~line,data=SaurAngle, xlab="line", border ="red", ylab="angle", ylim =c(-40,120))																								down	0.148289
						Col0	53.13													> stripchart(angle~line, data=SaurAngle, method='jitter',add = TRUE, pch=16,																								down	0.154082
						Col0	60.255													+ xlab="line", ylab="angle",ylim =c(-40,120), vertical=TRUE)																								down	0.175887
						Col0	45																																					down	0.176355
						Col0	19.654																																					down	0.165786
						Col0	51.34																																					down	0.163345
						Col0	20.225																																					down	0.175677
						Col0	53.13																																					down	0.182651
						Col0	61.189																																					down	0.179845
						Col0	75.069																																					down	0.158521
						Col0	71.565																																					down	0.176248
						Col0	81.469																																					down	0.188539
						Col0	53.973																																					down	0.205836
						Col0	40.236																																					down	0.182475
						Col0	36.87																																					down	0.146853
						Col0	29.055																																					down	0.144105
						Col0	81.87																																					down	0.147222
						Col0	40.236																																					down	0.151794
						Col0	45																																					down	0.161483
						Col0	48.013																																					down	0.17052
						Col0	50.711																																					down	0.173592
						Col0	55.62																																					down	0.177703
						Col0	57.095																																					down	0.182038
						Col0	30.964																																					down	0.191409
						Col0	76.504																																					down	0.191763
						Col0	57.995																																					down	0.183236
						Col0	48.576																																					down	0.168585
						Col0	29.745																																					down	0.165627
						Col0	35.838																																					down	0.166754
						Col0	16.699																																					down	0.173251
						Col0	18.435																																					down	0.174592
						Col0	26.565																																					down	0.176161
						Col0	20.556																																					down	0.183275
						Col0	38.157																																					down	0.177211
						Col0	59.036																																					left	0.351096
						Col0	58.57																																					left	0.347062
						Col0	38.66																																					left	0.346342
						Col0	36.469																																					left	0.358314
						Col0	41.82																																					left	0.371095
						Col0	68.199																																					left	0.376799
						Col0	56.31																																					left	0.37235
						Col0	53.393																																					left	0.373721
						Col0	65.136																																					left	0.380058
						Col0	64.134																																					left	0.380199
						Col0	58.841																																					left	0.368056
						Col0	75.7																																					left	0.35134
						Col0	41.634																																					left	0.344229
						Col0	53.746																																					left	0.33434
						Col0	49.574																																					left	0.34538
						Col0	93.366																																					left	0.346412
						Col0	71.114																																					left	0.352025
						Col0	38.66																																					left	0.349434
						Col0	26.565																																					left	0.341938
						Col0	70.346																																					left	0.341573
						Col0	70.017																																					left	0.34352
						Col0	54.782																																					left	0.347801
						Col0	50.44																																					left	0.361376
						Col0	49.399																																					left	0.368171
						Col0	33.69																																					left	0.371058
						Col0	71.565																																					left	0.378224
						Col0	48.013																																					left	0.390154
						Col0	34.992																																					left	0.398563
						Col0	24.775																																					left	0.4054
						Col0	45																																					left	0.400282
						Col0	67.38																																					left	0.384525
						Col0	54.689																																					left	0.365107
						Col0	49.635																																					left	0.364158
						Col0	50.711																																					left	0.365072
						Col0	57.995																																					left	0.3596
						Col0	67.521																																					left	0.354093
						Col0	45																																					left	0.344171
						Col0	56.31																																					left	0.385171
						Col0	39.472																																					left	0.38571
						Col0	72.121																																					left	0.377666
						Col0	77.8																																					left	0.372367
						Col0	53.13																																					left	0.37895
						Col0	40.426																																					left	0.388502
						Col0	71.03																																					left	0.383488
						Col0	51.633																																					left	0.372631
						Col0	61.631																																					left	0.389778
						Col0	29.745																																					left	0.382778
						Col0	42.709																																					left	0.374089
						Col0	23.051																																					left	0.378398
						Col0	52.549																																					left	0.315637
						Col0	36.469																																					left	0.312017
						Col0	36.674																																					left	0.302542
						Col0	33.341																																					left	0.291582
						Col0	68.703																																					left	0.294179
						Col0	29.539																																					left	0.3081
						Col0	58.241																																					left	0.306485
						Col0	47.291																																					left	0.290491
						Col0	81.416																																					left	0.275564
						Col0	51.667																																					left	0.269328
						Col0	68.009																																					left	0.275565
						Col0	51.667																																					left	0.246918
						Col0	73.523																																					left	0.217638
						Col0	94.764																																					left	0.214709
						Col0	75.964																																					left	0.223141
						Col0	45.855																																					left	0.225156
						Col0	99.273																																					left	0.223891
						Col0	63.435																																					left	0.226673
						Col0	86.348																																					left	0.227868
						Col0	39.987																																					left	0.224827
						Col0	83.367																																					left	0.237287
						Col0	44.029																																					left	0.240313
						Col0	77.619																																					left	0.231061
						Col0	82.476																																					left	0.218996
						Col0	29.358																																					left	0.307521
						Col0	67.286																																					left	0.308726
						Col0	66.666																																					left	0.320331
						Col0	38.66																																					left	0.321915
						Col0	60.124																																					left	0.342257
						Col0	54.039																																					left	0.334418
						Col0	56.31																																					left	0.30761
						Col0	46.469																																					left	0.312247
						Col0	63.435																																					left	0.349786
						Col0	70.56																																					left	0.335057
						Col0	56.915																																					left	0.285861
						Col0	57.426																																					left	0.273273
						Col0	70.115																																					left	0.264403
						Col0	56.023																																					left	0.277223
						Col0	51.189																																					left	0.284755
						Col0	71.822																																					right	0.260613
						Col0	39.898																																					right	0.278132
						Col0	67.068																																					right	0.26549
						Col0	35.538																																					right	0.219328
						Col0	63.435																																					right	0.209143
						Col0	43.781																																					right	0.219055
						Col0	61.928																																					right	0.208395
						Col0	46.042																																					right	0.217964
						Col0	64.093																																					right	0.21973
						Col0	60.803																																					right	0.22316
						Col0	60.642																																					right	0.235102
						ost2-2	46.081																																					right	0.233026
						ost2-2	37.875																																					right	0.216579
						ost2-2	61.928																																					right	0.187971
						ost2-2	48.18																																					right	0.195242
						ost2-2	72.553																																					right	0.29255
						ost2-2	37.875																																					right	0.295951
						ost2-2	54.462																																					right	0.306343
						ost2-2	49.399																																					right	0.325002
						ost2-2	59.036																																					right	0.321972
						ost2-2	63.435																																					right	0.319219
						ost2-2	81.634																																					right	0.33905
						ost2-2	43.603																																					right	0.343617
						ost2-2	47.291																																					right	0.326939
						ost2-2	52.765																																					right	0.328396
						ost2-2	55.784																																					right	0.328626
						ost2-2	31.608																																					right	0.335872
						ost2-2	50.711																																					right	0.323626
						ost2-2	37.304																																					right	0.316833
						ost2-2	73.142																																					right	0.307522
						ost2-2	63.435																																					right	0.311289
						ost2-2	57.995																																					right	0.310802
						ost2-2	72.072																																					right	0.310923
						ost2-2	36.027																																					right	0.312245
						ost2-2	35.754																																					right	0.316067
						ost2-2	51.34																																					right	0.317505
						ost2-2	49.574																																					right	0.309012
						ost2-2	41.878																																					right	0.295836
						ost2-2	37.747																																					right	0.473843
						ost2-2	58.392																																					right	0.462608
						ost2-2	46.273																																					right	0.44266
						ost2-2	74.982																																					right	0.427021
						ost2-2	49.236																																					right	0.417597
						ost2-2	43.831																																					right	0.424086
						ost2-2	73.301																																					right	0.426355
						ost2-2	67.38																																					right	0.422372
						ost2-2	68.334																																					right	0.420845
						ost2-2	35.538																																					right	0.419811
						ost2-2	54.462																																					right	0.419843
						ost2-2	57.529																																					right	0.423288
						ost2-2	47.626																																					right	0.320187
						ost2-2	30.828																																					right	0.309406
						ost2-2	44.454																																					right	0.310311
						ost2-2	59.967																																					right	0.312312
						ost2-2Xaha2	19.983																																					right	0.31
						ost2-2Xaha2	-31.43																																					right	0.311403
						ost2-2Xaha2	30.964																																					right	0.325656
						ost2-2Xaha2	-25.201																																					right	0.325354
						ost2-2Xaha2	135																																					right	0.306695
						ost2-2Xaha2	6.71																																					right	0.30354
						ost2-2Xaha2	0																																					right	0.309134
						ost2-2Xaha2	28.61																																					right	0.388004
						ost2-2Xaha2	12.529																																					right	0.300115
						ost2-2Xaha2	-28.072																																					right	0.302641
						ost2-2Xaha2	-29.745																																					right	0.284811
						ost2-2Xaha2	0																																					right	0.286849
						ost2-2Xaha2	7.431																																					right	0.290158
						ost2-2Xaha2	-17.526																																					right	0.285579
						ost2-2Xaha2	1.736																																					right	0.295408
						ost2-2Xaha2	0																																					right	0.280295
						ost2-2Xaha2	31.759																																					right	0.270978
						ost2-2Xaha2	40.764																																					right	0.270652
						ost2-2Xaha2	26.565																																					right	0.260714
						ost2-2Xaha2	15.422																																					right	0.274305
						ost2-2Xaha2	6.009																																					right	0.277119
						ost2-2Xaha2	8.13																																					right	0.319898
						ost2-2Xaha2	4.97																																					right	0.351227
						ost2-2Xaha2	28.443																																					right	0.346384
						ost2-2Xaha2	-41.987																																					right	0.322018
						ost2-2Xaha2	20.556																																					right	0.305613
						ost2-2Xaha2	14.036																																					right	0.297924
						ost2-2Xaha2	-145.008																																					right	0.292343
						ost2-2Xaha2	9.162																																					right	0.302226
						ost2-2Xaha2	-53.973																																					right	0.308252
						ost2-2Xaha2	26.565																																					right	0.31072
						ost2-2Xaha2	51.34																																					right	0.30438
						ost2-2Xaha2	61.39																																					right	0.297333
						ost2-2Xaha2	42.709																																					right	0.300661
						ost2-2Xaha2	23.749																																					right	0.304052
						ost2-2Xaha2	13.627																																					right	0.311206
						ost2-2Xaha2	54.462																																					up	0.233257
						ost2-2Xaha2	15.945																																					up	0.246834
						ost2-2Xaha2	17.354																																					up	0.27371
						ost2-2Xaha2	22.249																																					up	0.297
						ost2-2Xaha2	5.44																																					up	0.308833
						ost2-2Xaha2	30.964																																					up	0.300039
						ost2-2Xaha2	41.987																																					up	0.323507
						ost2-2Xaha2	31.759																																					up	0.318969
						ost2-2Xaha2	22.249																																					up	0.304317
						ost2-2Xaha2	34.695																																					up	0.304861
						ost2-2Xaha2	39.472																																					up	0.314526
						ost2-2Xaha2	-17.65																																					up	0.3414
						ost2-2Xaha2	7.125																																					up	0.360136
						ost2-2Xaha2	9.09																																					up	0.356616
						SAUR19-GFP	61.39																																					up	0.329382
						SAUR19-GFP	50.528																																					up	0.352081
						SAUR19-GFP	-12.529																																					up	0.349918
						SAUR19-GFP	23.962																																					up	0.352796
						SAUR19-GFP	51.843																																					up	0.36557
						SAUR19-GFP	46.975																																					up	0.363589
						SAUR19-GFP	36.254																																					up	0.376148
						SAUR19-GFP	56.31																																					up	0.373799
						SAUR19-GFP	28.887																																					up	0.348682
						SAUR19-GFP	41.82																																					up	0.331985
						SAUR19-GFP	14.931																																					up	0.309721
						SAUR19-GFP	60.945																																					up	0.283235
						SAUR19-GFP	53.13																																					up	0.280637
						SAUR19-GFP	42.274																																					up	0.29376
						SAUR19-GFP	15.945																																					up	0.308998
						SAUR19-GFP	46.548																																					up	0.309371
						SAUR19-GFP	11.31																																					up	0.264599
						SAUR19-GFP	27.979																																					up	0.310205
						SAUR19-GFP	35.838																																					up	0.301347
						SAUR19-GFP	76.329																																					up	0.27601
						SAUR19-GFP	104.744																																					up	0.304255
						SAUR19-GFP	55.923																																					up	0.308139
						SAUR19-GFP	26.095																																					up	0.319553
						SAUR19-GFP	92.77																																					up	0.333001
						SAUR19-GFP	31.551																																					up	0.327501
						SAUR19-GFP	34.38																																					up	0.318689
						SAUR19-GFP	47.386																																					up	0.322043
						SAUR19-GFP	-26.565																																					up	0.313346
						SAUR19-GFP	-14.036																																					up	0.282262
						SAUR19-GFP	-9.462																																					up	0.261891
						SAUR19-GFP	-20.136																																					up	0.268241
						SAUR19-GFP	30.53																																					up	0.2818
						SAUR19-GFP	98.531																																					up	0.293188
						SAUR19-GFP	162.897																																					up	0.293188
						SAUR19-GFP	75.069																																					up	0.320804
						SAUR19-GFP	0																																					up	0.310932
						SAUR19-GFP	-8.858																																					up	0.293477
						SAUR19-GFP	24.717																																					up	0.323187
						SAUR19-GFP	32.171																																					up	0.338386
						SAUR19-GFP	15.388																																					up	0.324324
						SAUR19-GFP	45.616																																					up	0.326116
						SAUR19-GFP	60.068																																					up	0.348045
						SAUR19-GFP	30.256																																					up	0.349071
						SAUR19-GFP	1.569																																					up	0.31682
						SAUR19-GFP	22.109																																					up	0.305145
						SAUR19-GFP	43.625																																					up	0.312409
						SAUR19-GFP	35.538																																					up	0.325062
						SAUR19-GFP	42.274																																					up	0.340425
						SAUR19-GFP	0																																					up	0.364102
						SAUR19-GFP	55.491																																					up	0.389436
						SAUR19-GFP	33.366																																					up	0.365326
						SAUR19-GFP	39.806																																					up	0.336704
						SAUR19-GFP	4.635																																					down	0.263467
						SAUR19-GFP	43.995																																					down	0.266325
																																												down	0.262417
																																												down	0.278889
																																												down	0.272258
																																												down	0.262438
																																												down	0.270614
																																												down	0.257772
																																												down	0.269422
																																												down	0.278264
																																												down	0.265323
																																												down	0.363274
																																												down	0.271309
																																												down	0.275614
																																												down	0.270722
																																												down	0.232002
																																												down	0.206586
																																												down	0.213208
																																												down	0.235224
																																												down	0.231755
																																												down	0.228232
																																												down	0.236215
																																												down	0.232433
																																												down	0.236576
																																												down	0.249683
																																												down	0.23802
																																												down	0.202644
																																												down	0.172193
																																												down	0.176118
																																												down	0.187957
																																												down	0.182094
																																												down	0.197013
																																												down	0.188499
																																												down	0.185706
																																												down	0.181122
																																												down	0.182981
																																												down	0.181339
																																												down	0.183731
																																												down	0.183691
																																												down	0.181277
																																												down	0.178655
																																												down	0.183654
																																												down	0.194085
																																												down	0.199961
																																												down	0.195506
																																												down	0.18295
																																												down	0.179082
																																												down	0.16629
																																												down	0.224586
																																												down	0.226468
																																												down	0.243132
																																												down	0.248252
																																												down	0.265752
																																												down	0.288785
																																												down	0.310796
																																												down	0.307249
																																												down	0.287542
																																												down	0.220799
																																												down	0.212999
																																												down	0.227045
																																												down	0.248984
																																												down	0.259047
																																												down	0.274545
																																												down	0.268462
																																												down	0.241273
																																												down	0.296308

## Sheet: Fig.3fig.Supp source data
2015-05-25 tir triple mutant (II) and repetition of the SAUR19-GFP, amisaur
tir1-1 afb2,3
time	0	10	20	30	40	50	60	70	80	90	100	110	120	130	stdevs
DM	100	100.72	101.105	101.092	101.162	101.107	101.011	101.081	101.162	101.359	101.359	101.177	100.975	101.362	DM	0	0.096135	0.181102	0.236421	0.289339	0.256427	0.416433	0.467251	0.289339	0.019815	0.019815	0.300583	0.853229	0.734485
NAA	100	100.892	100.945	102.062	103.545	104.982	106.363	108.018	109.334	110.474	111.25	111.868	112.301	112.573	NAA	0	0.209195	0.482182	0.954975	1.19694	1.70596	1.94868	2.27139	2.74938	2.88593	3.32579	3.66403	3.90163	3.9171
FC	100	100.896	101.832	102.98	104.509	106.134	108.181	110.478	112.684	114.711	116.552	118.538	120.02	121.492	FC	0	0.23497	0.441902	0.811462	1.146	1.30692	1.69568	2.07774	2.5316	3.16807	3.39936	3.96269	4.31997	4.78554
2015-03-24: HS::axr3-1 experiment
non-heatshocked HS::axr3-1															stdevs
time	0	10	20	30	40	50	60	70	80	90	100	110	120	130
DM	100	99.8489	100.024	100.16	100.31	100.16	100.244	100.338	100.376	100.199	100.614	100.442	100.848	100.084	DM	0	0.369429	0.628648	0.546083	0.594007	0.647391	0.73521	0.378632	0.536788	0.499979	0.542355	0.561608	0.585626	1.10513	3.75866
NAA	100	100.266	100.942	101.854	102.579	103.865	104.27	104.485	104.689	105.452	105.499	105.587	106.181	106.262	NAA	0	0.445125	0.700993	1.31494	1.53746	2.395	2.22187	2.53938	2.80715	2.95659	2.98619	3.08054	2.83519	2.95402	2.11828
FC	100	100.581	101.169	101.943	103.31	104.68	105.83	107.59	109.567	111.577	113.436	115.246	116.85	118.746	FC	0	0.379526	0.835254	0.821673	1.17691	1.80047	1.7366	1.5673	1.85985	1.8741	2.20493	2.22839	2.43019	2.19592	3.21467
